# Supplementary material for: Origins of Japanese flowering cherry (Prunus subgenus Cerasus) cultivars revealed using nuclear SSR markers
Source: Springer Nature journal article supplement (doi:10.1007/s11295-014-0697-1), 2014-01-29
Supplement: 11295_2014_697_MOESM5_ESM.pdf [file 11295_2014_697_MOESM5_ESM.pdf]

Online Resource 5. Inferences, from morphological classification and STRUCTURE analysis, on the origins of Japanese flowering cherry cultivars

| Scientific name/Japanese name<br>(New clone no.) | Morphological classification <sup>a</sup> |     |     |     |             |     |             |     |     |     |     | STRUCTURE analysis ( $K = 7$ ) <sup>b</sup> |      |             |                         |                         |                         | STRUCTURE analysis ( $K = 11$ ) <sup>b</sup> |             |      |      |      |      |                         |                         |                         |      |                         |                         |                         |
|--------------------------------------------------|-------------------------------------------|-----|-----|-----|-------------|-----|-------------|-----|-----|-----|-----|---------------------------------------------|------|-------------|-------------------------|-------------------------|-------------------------|----------------------------------------------|-------------|------|------|------|------|-------------------------|-------------------------|-------------------------|------|-------------------------|-------------------------|-------------------------|
|                                                  | cam                                       | pse | pen | ape | ape.<br>pil | inc | inc.<br>kin | nip | sar | ver | jam | lan.<br>spe                                 | max  | cam/<br>pse | pen                     | ape/<br>inc/<br>nip     | sar/<br>ver             | jam                                          | lan.<br>spe | max  | cam  | pse  | pen  | ape                     | ape.<br>pil/<br>inc     | nip                     | sar  | ver                     | jam                     | lan.<br>spe             |
| <b><i>Prunus lannesiana</i></b>                  |                                           |     |     |     |             |     |             |     |     |     |     |                                             |      |             |                         |                         |                         |                                              |             |      |      |      |      |                         |                         |                         |      |                         |                         |                         |
| 'Affinis'/上旬 (Cer001)                            | -                                         | -   | -   | -   | -           | -   | -           | -   | -   | -   | ○   | -                                           | 0.01 | -           | 0.01                    | 0.01                    | <b>0.31<sup>+</sup></b> | <b>0.64<sup>†</sup></b>                      | -           | 0.01 | -    | -    | -    | 0.01                    | -                       | -                       | -    | -                       | <b>0.31<sup>+</sup></b> | <b>0.63<sup>†</sup></b> |
| 'Hotate'/帆立 (Cer001)                             | -                                         | -   | -   | -   | -           | -   | -           | -   | -   | -   | ○   | -                                           | 0.01 | -           | 0.01                    | 0.01                    | <b>0.31<sup>+</sup></b> | <b>0.64<sup>†</sup></b>                      | -           | 0.01 | -    | -    | -    | 0.01                    | -                       | -                       | -    | -                       | <b>0.31<sup>+</sup></b> | <b>0.63<sup>†</sup></b> |
| 'Albo-rosea'/普賢象 (Cer002-i)                      | -                                         | -   | -   | -   | -           | -   | -           | -   | -   | -   | ○   | -                                           | 0.01 | -           | 0.07                    | 0.10                    | <b>0.33<sup>+</sup></b> | <b>0.47<sup>†</sup></b>                      | -           | -    | -    | -    | -    | <b>0.15<sup>+</sup></b> | 0.02                    | -                       | 0.02 | <b>0.32<sup>+</sup></b> | <b>0.46<sup>†</sup></b> |                         |
| 'Kusimana'/玖島桜 (Cer002-i)                        | -                                         | -   | -   | -   | -           | -   | -           | -   | -   | -   | ○   | -                                           | 0.01 | -           | 0.07                    | 0.10                    | <b>0.33<sup>+</sup></b> | <b>0.47<sup>†</sup></b>                      | -           | -    | -    | -    | -    | <b>0.15<sup>+</sup></b> | 0.02                    | -                       | 0.02 | <b>0.32<sup>+</sup></b> | <b>0.46<sup>†</sup></b> |                         |
| 'Albo-rosea'/普賢象 (Cer002-ii)                     | -                                         | -   | -   | -   | -           | -   | -           | -   | -   | -   | ○   | -                                           | 0.01 | -           | 0.08                    | 0.09                    | <b>0.34<sup>+</sup></b> | <b>0.47<sup>†</sup></b>                      | -           | -    | -    | -    | -    | <b>0.17<sup>+</sup></b> | 0.02                    | -                       | 0.02 | <b>0.31<sup>+</sup></b> | <b>0.46<sup>†</sup></b> |                         |
| 'Arakawaensis'/荒川旬 (Cer003)                      | -                                         | -   | -   | -   | -           | -   | -           | ○   | -   | ○   | ○   | -                                           | -    | -           | -                       | 0.05                    | <b>0.51<sup>†</sup></b> | <b>0.42<sup>†</sup></b>                      | -           | -    | -    | -    | -    | -                       | -                       | -                       | 0.06 | <b>0.50<sup>†</sup></b> | <b>0.41<sup>†</sup></b> |                         |
| 'Arakawaensis'/荒川旬 (Cer004)                      | -                                         | -   | -   | -   | -           | -   | -           | ○   | -   | ○   | ○   | -                                           | -    | -           | 0.06                    | 0.02                    | <b>0.24<sup>†</sup></b> | <b>0.67<sup>†</sup></b>                      | -           | -    | -    | -    | -    | 0.06                    | -                       | -                       | 0.02 | <b>0.24<sup>†</sup></b> | <b>0.64<sup>†</sup></b> |                         |
| 'Arasiyama'/嵐山 (Cer005)                          | -                                         | -   | -   | -   | -           | -   | -           | ○   | -   | ○   | ○   | 0.02                                        | -    | -           | 0.11                    | 0.06                    | <b>0.17<sup>†</sup></b> | <b>0.62<sup>†</sup></b>                      | 0.03        | -    | -    | -    | -    | 0.10                    | 0.10                    | 0.01                    | 0.02 | 0.10                    | <b>0.62<sup>†</sup></b> |                         |
| 'Cataracta'/滝旬 (Cer006-i)                        | -                                         | -   | -   | -   | -           | -   | -           | -   | -   | -   | ○   | -                                           | -    | -           | 0.06                    | 0.03                    | <b>0.29<sup>†</sup></b> | <b>0.61<sup>†</sup></b>                      | -           | -    | -    | -    | 0.01 | 0.05                    | 0.04                    | -                       | 0.03 | <b>0.24<sup>†</sup></b> | <b>0.60<sup>†</sup></b> |                         |
| 'Sancta'/明月 (Cer006-i)                           | -                                         | -   | -   | -   | -           | -   | -           | -   | -   | -   | ○   | -                                           | -    | -           | 0.06                    | 0.03                    | <b>0.29<sup>†</sup></b> | <b>0.61<sup>†</sup></b>                      | -           | -    | -    | -    | 0.01 | 0.05                    | 0.04                    | -                       | 0.03 | <b>0.24<sup>†</sup></b> | <b>0.60<sup>†</sup></b> |                         |
| 'Surugadai-odora'/駿河台旬 (Cer006-i)                | -                                         | -   | -   | -   | -           | -   | -           | -   | -   | -   | ○   | -                                           | -    | -           | 0.06                    | 0.03                    | <b>0.29<sup>†</sup></b> | <b>0.61<sup>†</sup></b>                      | -           | -    | -    | -    | 0.01 | 0.05                    | 0.04                    | -                       | 0.03 | <b>0.24<sup>†</sup></b> | <b>0.60<sup>†</sup></b> |                         |
| 'Gozanomanioi'/御座の間旬 (Cer006-ii)                 | -                                         | -   | -   | -   | -           | -   | -           | -   | -   | -   | ○   | -                                           | -    | -           | 0.10                    | 0.05                    | <b>0.23<sup>†</sup></b> | <b>0.61<sup>†</sup></b>                      | -           | -    | -    | -    | -    | 0.10                    | 0.03                    | -                       | 0.04 | <b>0.20<sup>†</sup></b> | <b>0.61<sup>†</sup></b> |                         |
| 'Choshiuhizakura'/長州緋桜 (Cer007)                  | -                                         | -   | -   | -   | -           | -   | -           | ○   | -   | ○   | ○   | -                                           | -    | -           | <b>0.20<sup>+</sup></b> | 0.04                    | <b>0.46<sup>†</sup></b> | <b>0.29<sup>†</sup></b>                      | -           | -    | -    | -    | -    | 0.06                    | <b>0.20<sup>+</sup></b> | 0.05                    | -    | <b>0.40<sup>†</sup></b> | <b>0.26<sup>†</sup></b> |                         |
| 'Kenrokuen-kumagai'/兼六園熊谷 (Cer007)               | -                                         | -   | -   | -   | -           | -   | -           | -   | -   | -   | ○   | -                                           | -    | -           | <b>0.20<sup>+</sup></b> | 0.04                    | <b>0.46<sup>†</sup></b> | <b>0.29<sup>†</sup></b>                      | -           | -    | -    | -    | -    | 0.06                    | <b>0.19<sup>+</sup></b> | 0.05                    | -    | <b>0.41<sup>†</sup></b> | <b>0.26<sup>†</sup></b> |                         |
| 'Kenrokuen-kumagai'/兼六園熊谷 (Cer008)               | -                                         | -   | -   | -   | -           | -   | -           | -   | -   | -   | ○   | -                                           | -    | -           | 0.17                    | 0.03                    | <b>0.44<sup>†</sup></b> | <b>0.35<sup>†</sup></b>                      | -           | -    | -    | -    | -    | 0.02                    | <b>0.16<sup>+</sup></b> | 0.05                    | -    | <b>0.42<sup>†</sup></b> | <b>0.33<sup>†</sup></b> |                         |
| 'Contorta'/福祿寿 (Cer009)                          | -                                         | -   | -   | -   | -           | -   | -           | -   | -   | -   | ○   | -                                           | 0.01 | -           | 0.06                    | <b>0.26<sup>†</sup></b> | <b>0.14<sup>†</sup></b> | <b>0.51<sup>†</sup></b>                      | -           | -    | -    | -    | -    | <b>0.16<sup>+</sup></b> | 0.02                    | 0.10                    | 0.07 | 0.11                    | <b>0.51<sup>†</sup></b> |                         |
| 'Versicolor'/八重曙 (Cer009)                        | -                                         | -   | -   | -   | -           | -   | -           | -   | -   | -   | ○   | -                                           | 0.01 | -           | 0.06                    | <b>0.26<sup>†</sup></b> | <b>0.14<sup>†</sup></b> | <b>0.51<sup>†</sup></b>                      | -           | -    | -    | -    | -    | <b>0.17<sup>+</sup></b> | 0.02                    | 0.10                    | 0.07 | 0.11                    | <b>0.51<sup>†</sup></b> |                         |
| 'Erecta'/天の川 (Cer010-i)                          | -                                         | -   | -   | -   | -           | -   | -           | -   | -   | -   | ○   | -                                           | -    | 0.01        | 0.07                    | 0.09                    | <b>0.31<sup>†</sup></b> | <b>0.49<sup>†</sup></b>                      | -           | -    | -    | -    | -    | <b>0.14<sup>+</sup></b> | 0.04                    | -                       | 0.04 | <b>0.27<sup>†</sup></b> | <b>0.48<sup>†</sup></b> |                         |
| 'Versicolor'/八重曙 (Cer010-ii)                     | -                                         | -   | -   | -   | -           | -   | -           | -   | -   | -   | ○   | -                                           | -    | 0.06        | 0.04                    | 0.07                    | <b>0.32<sup>†</sup></b> | <b>0.50<sup>†</sup></b>                      | -           | -    | -    | 0.04 | -    | 0.08                    | 0.04                    | -                       | 0.04 | <b>0.29<sup>†</sup></b> | <b>0.49<sup>†</sup></b> |                         |
| 'Eigenji'/永源寺 (Cer011a)                          | -                                         | -   | -   | -   | -           | -   | -           | -   | -   | -   | ○   | -                                           | -    | -           | 0.08                    | 0.04                    | <b>0.34<sup>†</sup></b> | <b>0.53<sup>†</sup></b>                      | -           | -    | -    | -    | -    | 0.01                    | 0.11                    | -                       | 0.02 | <b>0.31<sup>†</sup></b> | <b>0.52<sup>†</sup></b> |                         |
| 'Fusa-zakura'/房桜 (Cer011a)                       | -                                         | -   | -   | -   | -           | -   | -           | -   | -   | -   | ○   | -                                           | -    | -           | 0.08                    | 0.04                    | <b>0.34<sup>†</sup></b> | <b>0.53<sup>†</sup></b>                      | -           | -    | -    | -    | -    | 0.01                    | 0.11                    | -                       | 0.02 | <b>0.31<sup>†</sup></b> | <b>0.52<sup>†</sup></b> |                         |
| 'Gioiko'/御衣黄 (Cer011b-i)                         | -                                         | -   | -   | -   | -           | -   | -           | -   | -   | -   | ○   | -                                           | -    | -           | 0.09                    | 0.05                    | <b>0.33<sup>†</sup></b> | <b>0.52<sup>†</sup></b>                      | -           | -    | -    | -    | -    | 0.02                    | 0.08                    | 0.04                    | 0.02 | <b>0.31<sup>†</sup></b> | <b>0.51<sup>†</sup></b> |                         |
| 'Grandiflora'/鬱金 (Cer011b-i)                     | -                                         | -   | -   | -   | -           | -   | -           | -   | -   | -   | ○   | -                                           | -    | -           | 0.09                    | 0.05                    | <b>0.33<sup>†</sup></b> | <b>0.52<sup>†</sup></b>                      | -           | -    | -    | -    | -    | 0.02                    | 0.08                    | 0.05                    | 0.02 | <b>0.31<sup>†</sup></b> | <b>0.51<sup>†</sup></b> |                         |
| 'Gioiko'/御衣黄 (Cer011b-ii)                        | -                                         | -   | -   | -   | -           | -   | -           | -   | -   | -   | ○   | -                                           | -    | -           | 0.04                    | 0.04                    | <b>0.34<sup>†</sup></b> | <b>0.56<sup>†</sup></b>                      | -           | -    | -    | -    | -    | 0.02                    | 0.03                    | 0.06                    | -    | <b>0.33<sup>†</sup></b> | <b>0.54<sup>†</sup></b> |                         |
| 'Formosissima'/紅虎の尾 (Cer012)                     | -                                         | -   | -   | -   | -           | -   | -           | -   | -   | -   | ○   | 0.02                                        | -    | -           | 0.04                    | 0.03                    | <b>0.15<sup>†</sup></b> | <b>0.76<sup>†</sup></b>                      | 0.04        | -    | -    | -    | 0.01 | 0.03                    | 0.02                    | -                       | 0.04 | 0.08                    | <b>0.75<sup>†</sup></b> |                         |
| 'Gosiozakura'/五所桜 (Cer013)                       | -                                         | -   | -   | -   | -           | -   | -           | -   | -   | -   | ○   | 0.01                                        | -    | -           | 0.06                    | 0.02                    | <b>0.32<sup>†</sup></b> | <b>0.58<sup>†</sup></b>                      | 0.02        | -    | -    | -    | -    | 0.05                    | 0.05                    | -                       | -    | <b>0.28<sup>†</sup></b> | <b>0.57<sup>†</sup></b> |                         |
| 'Hisakura'/一葉 (Cer014)                           | -                                         | -   | -   | -   | -           | -   | -           | -   | -   | -   | ○   | -                                           | -    | -           | 0.07                    | 0.07                    | <b>0.25<sup>†</sup></b> | <b>0.59<sup>†</sup></b>                      | -           | -    | -    | -    | 0.02 | 0.04                    | 0.04                    | 0.01                    | 0.04 | <b>0.25<sup>†</sup></b> | <b>0.58<sup>†</sup></b> |                         |
| 'Kirin'/麒麟 (Cer015)                              | -                                         | -   | -   | -   | -           | -   | -           | -   | -   | -   | ○   | -                                           | -    | 0.02        | 0.06                    | 0.10                    | <b>0.27<sup>†</sup></b> | <b>0.54<sup>†</sup></b>                      | -           | -    | -    | 0.02 | -    | 0.03                    | 0.02                    | 0.03                    | 0.10 | <b>0.26<sup>†</sup></b> | <b>0.53<sup>†</sup></b> |                         |
| 'Kokeshimidsu'/苔清水 (Cer016)                      | -                                         | -   | -   | -   | -           | -   | -           | -   | -   | -   | ○   | -                                           | -    | 0.01        | 0.09                    | 0.06                    | <b>0.36<sup>†</sup></b> | <b>0.46<sup>†</sup></b>                      | -           | -    | -    | -    | -    | 0.09                    | 0.05                    | -                       | 0.04 | <b>0.34<sup>†</sup></b> | <b>0.46<sup>†</sup></b> |                         |
| 'Kongosan'/金剛山 (Cer017)                          | -                                         | -   | -   | -   | -           | -   | -           | ○   | -   | ○   | ○   | -                                           | -    | -           | 0.05                    | <b>0.31<sup>†</sup></b> | <b>0.29<sup>†</sup></b> | <b>0.34<sup>†</sup></b>                      | -           | -    | -    | -    | 0.03 | 0.02                    | 0.01                    | <b>0.30<sup>†</sup></b> | 0.02 | <b>0.30<sup>†</sup></b> | <b>0.32<sup>†</sup></b> |                         |
| 'Purpurea'/紫桜 (Cer017)                           | -                                         | -   | -   | -   | -           | -   | -           | ○   | -   | ○   | ○   | -                                           | -    | -           | 0.05                    | <b>0.31<sup>†</sup></b> | <b>0.29<sup>†</sup></b> | <b>0.34<sup>†</sup></b>                      | -           | -    | -    | -    | 0.03 | 0.02                    | 0.01                    | <b>0.30<sup>†</sup></b> | 0.02 | <b>0.30<sup>†</sup></b> | <b>0.32<sup>†</sup></b> |                         |
| 'Koshioyama'/小汐山 (Cer018)                        | -                                         | -   | -   | -   | -           | -   | -           | ○   | -   | ○   | ○   | -                                           | -    | -           | 0.18                    | 0.02                    | <b>0.57<sup>†</sup></b> | <b>0.21<sup>†</sup></b>                      | -           | -    | -    | -    | 0.02 | 0.01                    | <b>0.16<sup>†</sup></b> | -                       | 0.02 | <b>0.56<sup>†</sup></b> | <b>0.20<sup>†</sup></b> |                         |
| 'Masuyama'/増山 (Cer019)                           | -                                         | -   | -   | -   | -           | -   | -           | -   | ○   | -   | ○   | 0.01                                        | -    | -           | 0.05                    | 0.09                    | <b>0.42<sup>†</sup></b> | <b>0.41<sup>†</sup></b>                      | -           | -    | 0.01 | -    | 0.03 | 0.02                    | 0.01                    | -                       | 0.09 | <b>0.41<sup>†</sup></b> | <b>0.40<sup>†</sup></b> |                         |
| 'Shiogama'/塩釜桜 (Cer019)                          | -                                         | -   | -   | -   | -           | -   | -           | -   | -   | -   | ○   | 0.01                                        | -    | -           | 0.05                    | 0.09                    | <b>0.42<sup>†</sup></b> | <b>0.41<sup>†</sup></b>                      | -           | -    | 0.01 | -    | 0.03 | 0.02                    | 0.01                    | -                       | 0.09 | <b>0.41<sup>†</sup></b> | <b>0.40<sup>†</sup></b> |                         |
| 'Suisho'/水晶 (Cer019)                             | -                                         | -   | -   | -   | -           | -   | -           | -   | ○   | -   | ○   | 0.01                                        | -    | -           | 0.05                    | 0.09                    | <b>0.42<sup>†</sup></b> | <b>0.41<sup>†</sup></b>                      | -           | -    | 0.01 | -    | 0.03 | 0.02                    | 0.01                    | -                       | 0.09 | <b>0.41<sup>†</sup></b> | <b>0.40<sup>†</sup></b> |                         |
| 'Mikurumakaisi'/御車返し (Cer020a-i)                 | -                                         | -   | -   | -   | -           | -   | -           | -   | -   | -   | ○   | -                                           | -    | -           | 0.03                    | -                       | <b>0.26<sup>†</sup></b> | <b>0.69<sup>†</sup></b>                      | 0.01        | -    | -    | -    | -    | 0.05                    | -                       | -                       | -    | <b>0.23<sup>†</sup></b> | <b>0.69<sup>†</sup></b> |                         |
| 'Mikurumakaisi'/御車返し (Cer020a-ii)                | -                                         | -   | -   | -   | -           | -   | -           | -   | -   | -   | ○   | -                                           | -    | -           | 0.02                    | 0.01                    | <b>0.23<sup>†</sup></b> | <b>0.73<sup>†</sup></b>                      | 0.01        | -    | -    | -    | -    | 0.02                    | 0.01                    | -                       | -    | <b>0.20<sup>†</sup></b> | <b>0.73<sup>†</sup></b> |                         |
| 'Mikurumakaisi'/御車返し (Cer020a-iii)               | -                                         | -   | -   | -   | -           | -   | -           | -   | -   | -   | ○   | -                                           | -    | -           | 0.03                    | -                       | <b>0.26<sup>†</sup></b> | <b>0.69<sup>†</sup></b>                      | 0.01        | -    | -    | -    | -    | 0.05                    | -                       | -                       | -    | <b>0.23<sup>†</sup></b> | <b>0.69<sup>†</sup></b> |                         |
| 'Mikurumakaisi'/御車返し (Cer020b)                   | -                                         | -   | -   | -   | -           | -   | -           | -   | -   | -   | ○   | 0.01                                        | -    | -           | 0.04                    | -                       | <b>0.29<sup>†</sup></b> | <b>0.65<sup>†</sup></b>                      | -           | -    | -    | -    | -    | 0.05                    | -                       | -                       | 0.01 | <b>0.27<sup>†</sup></b> | <b>0.65<sup>†</sup></b> |                         |

Online Resource 5. (continued)

| Scientific name/Japanese name<br>(New clone no.) | Morphological classification <sup>a</sup> |     |     |     |             |     |             |     |     |     | STRUCTURE analysis ( $K = 7$ ) <sup>b</sup> |             |     |                         |                         | STRUCTURE analysis ( $K = 11$ ) <sup>b</sup> |                         |                         |             |      |     |                         |      |                         |                     |      |      |                         |                         |
|--------------------------------------------------|-------------------------------------------|-----|-----|-----|-------------|-----|-------------|-----|-----|-----|---------------------------------------------|-------------|-----|-------------------------|-------------------------|----------------------------------------------|-------------------------|-------------------------|-------------|------|-----|-------------------------|------|-------------------------|---------------------|------|------|-------------------------|-------------------------|
|                                                  | cam                                       | pse | pen | ape | ape.<br>pil | inc | inc.<br>kin | nip | sar | ver | jam                                         | lan.<br>spe | max | cam/<br>pse             | pen                     | ape/<br>inc/<br>nip                          | sar/<br>ver             | jam                     | lan.<br>spe | max  | cam | pse                     | pen  | ape                     | ape.<br>pil/<br>inc | nip  | sar  | ver                     | jam                     |
| 'Rubida'/弁殿 (Cer021)                             | -                                         | -   | -   | -   | -           | -   | -           | -   | ○   | -   | ○                                           | -           | -   | -                       | 0.04                    | 0.03                                         | <b>0.55<sup>†</sup></b> | <b>0.36<sup>+</sup></b> | -           | -    | -   | -                       | -    | 0.01                    | 0.06                | 0.01 | 0.02 | <b>0.53<sup>†</sup></b> | <b>0.35<sup>+</sup></b> |
| 'Sekiyama'/関山 (Cer022-i)                         | -                                         | -   | -   | -   | -           | -   | -           | -   | ○   | -   | ○                                           | -           | -   | -                       | 0.13                    | 0.04                                         | <b>0.18<sup>+</sup></b> | <b>0.63<sup>†</sup></b> | -           | -    | -   | -                       | -    | 0.02                    | 0.11                | 0.04 | 0.01 | <b>0.18<sup>+</sup></b> | <b>0.62<sup>†</sup></b> |
| 'Sekiyama'/関山 (Cer022-ii)                        | -                                         | -   | -   | -   | -           | -   | -           | -   | ○   | -   | ○                                           | -           | -   | -                       | 0.14                    | 0.04                                         | <b>0.21<sup>+</sup></b> | <b>0.60<sup>†</sup></b> | -           | -    | -   | -                       | -    | 0.02                    | 0.11                | 0.04 | 0.01 | <b>0.21<sup>+</sup></b> | <b>0.59<sup>†</sup></b> |
| 'Shujaku'/朱雀 (Cer023)                            | -                                         | -   | -   | -   | -           | -   | -           | -   | -   | -   | ○                                           | -           | -   | 0.02                    | -                       | 0.01                                         | <b>0.29<sup>+</sup></b> | <b>0.66<sup>‡</sup></b> | -           | -    | -   | 0.01                    | -    | -                       | -                   | -    | 0.01 | <b>0.29<sup>+</sup></b> | <b>0.65<sup>†</sup></b> |
| 'Similis'/類嵐 (Cer024)                            | -                                         | -   | -   | -   | -           | -   | -           | -   | ○   | -   | ○                                           | 0.01        | -   | 0.04                    | 0.08                    | 0.07                                         | <b>0.29<sup>+</sup></b> | <b>0.50<sup>†</sup></b> | 0.01        | -    | -   | 0.03                    | 0.01 | <b>0.17<sup>+</sup></b> | 0.02                | 0.01 | 0.01 | <b>0.24<sup>+</sup></b> | <b>0.49<sup>†</sup></b> |
| 'Sobanzakura'/早晚山 (Cer025)                       | -                                         | -   | -   | -   | -           | -   | -           | -   | -   | -   | ○                                           | -           | -   | -                       | 0.04                    | 0.02                                         | <b>0.36<sup>+</sup></b> | <b>0.57<sup>†</sup></b> | -           | 0.01 | -   | -                       | -    | -                       | 0.04                | -    | 0.01 | <b>0.35<sup>+</sup></b> | <b>0.56<sup>†</sup></b> |
| 'Spiralis'/渦桜 (Cer026)                           | -                                         | -   | -   | -   | -           | -   | -           | -   | -   | -   | ○                                           | -           | -   | -                       | 0.04                    | 0.04                                         | <b>0.29<sup>+</sup></b> | <b>0.62<sup>†</sup></b> | -           | -    | -   | -                       | -    | 0.01                    | 0.06                | -    | 0.02 | <b>0.27<sup>+</sup></b> | <b>0.61<sup>†</sup></b> |
| 'Superba'/松月 (Cer027)                            | -                                         | -   | -   | -   | -           | -   | -           | -   | -   | -   | ○                                           | -           | -   | 0.01                    | 0.04                    | 0.07                                         | <b>0.15<sup>+</sup></b> | <b>0.71<sup>‡</sup></b> | -           | -    | -   | -                       | -    | 0.09                    | 0.03                | -    | 0.03 | 0.11                    | <b>0.71<sup>‡</sup></b> |
| 'Azuma-nishiki'/東錦 (Cer028)                      | -                                         | -   | -   | -   | -           | -   | -           | -   | -   | -   | ○                                           | -           | -   | 0.01                    | 0.08                    | <b>0.17<sup>+</sup></b>                      | 0.11                    | <b>0.62<sup>†</sup></b> | -           | -    | -   | -                       | -    | <b>0.20<sup>+</sup></b> | 0.04                | -    | 0.09 | 0.03                    | <b>0.62<sup>†</sup></b> |
| 'Fasciculata'/糸括 (Cer028)                        | -                                         | -   | -   | -   | -           | -   | -           | -   | -   | -   | ○                                           | -           | -   | 0.01                    | 0.08                    | <b>0.17<sup>+</sup></b>                      | 0.11                    | <b>0.62<sup>†</sup></b> | -           | -    | -   | -                       | -    | <b>0.20<sup>+</sup></b> | 0.04                | -    | 0.09 | 0.03                    | <b>0.62<sup>†</sup></b> |
| 'Hakusan-ohemari'/白山大手毬 (Cer028)                 | -                                         | -   | -   | -   | -           | -   | -           | -   | -   | -   | ○                                           | -           | -   | 0.01                    | 0.08                    | <b>0.17<sup>+</sup></b>                      | 0.11                    | <b>0.62<sup>†</sup></b> | -           | -    | -   | -                       | -    | <b>0.20<sup>+</sup></b> | 0.04                | -    | 0.09 | 0.03                    | <b>0.62<sup>†</sup></b> |
| 'Nobilis'/江戸 (Cer028)                            | -                                         | -   | -   | -   | -           | -   | -           | -   | -   | -   | ○                                           | -           | -   | 0.01                    | 0.08                    | <b>0.17<sup>+</sup></b>                      | 0.11                    | <b>0.62<sup>†</sup></b> | -           | -    | -   | -                       | -    | <b>0.20<sup>+</sup></b> | 0.04                | -    | 0.09 | 0.03                    | <b>0.62<sup>†</sup></b> |
| 'Yae-benitorano-o'/八重紅虎の尾 (Cer028)               | -                                         | -   | -   | -   | -           | -   | -           | -   | -   | -   | ○                                           | -           | -   | 0.01                    | 0.08                    | <b>0.17<sup>+</sup></b>                      | 0.11                    | <b>0.62<sup>†</sup></b> | -           | -    | -   | -                       | -    | <b>0.20<sup>+</sup></b> | 0.04                | -    | 0.09 | 0.03                    | <b>0.62<sup>†</sup></b> |
| 'Azuma-nishiki'/東錦 (Cer029-i)                    | -                                         | -   | -   | -   | -           | -   | -           | -   | -   | -   | ○                                           | -           | -   | -                       | 0.10                    | <b>0.29<sup>+</sup></b>                      | <b>0.17<sup>+</sup></b> | <b>0.42<sup>†</sup></b> | -           | -    | -   | -                       | -    | 0.13                    | 0.05                | 0.07 | 0.16 | <b>0.15<sup>+</sup></b> | <b>0.41<sup>+</sup></b> |
| 'Fasciculata'/糸括 (Cer029-i)                      | -                                         | -   | -   | -   | -           | -   | -           | -   | -   | -   | ○                                           | -           | -   | 0.01                    | 0.10                    | <b>0.29<sup>+</sup></b>                      | <b>0.17<sup>+</sup></b> | <b>0.42<sup>†</sup></b> | -           | -    | -   | -                       | -    | 0.13                    | 0.05                | 0.07 | 0.16 | <b>0.16<sup>+</sup></b> | <b>0.41<sup>+</sup></b> |
| 'Mollis'/楊貴妃 (Cer029-i)                          | -                                         | -   | -   | -   | -           | -   | -           | -   | -   | -   | ○                                           | -           | -   | -                       | 0.10                    | <b>0.29<sup>+</sup></b>                      | <b>0.17<sup>+</sup></b> | <b>0.42<sup>†</sup></b> | -           | -    | -   | -                       | -    | 0.13                    | 0.05                | 0.07 | 0.16 | <b>0.16<sup>+</sup></b> | <b>0.41<sup>+</sup></b> |
| 'Azuma-nishiki'/東錦 (Cer029-ii)                   | -                                         | -   | -   | -   | -           | -   | -           | -   | -   | -   | ○                                           | -           | -   | 0.03                    | 0.08                    | <b>0.29<sup>+</sup></b>                      | <b>0.17<sup>+</sup></b> | <b>0.43<sup>†</sup></b> | -           | -    | -   | 0.02                    | 0.01 | 0.08                    | 0.06                | 0.07 | 0.17 | <b>0.16<sup>+</sup></b> | <b>0.42<sup>†</sup></b> |
| 'Kariginu'/狩衣 (Cer031a)                          | -                                         | -   | -   | -   | -           | -   | -           | -   | -   | -   | ○                                           | -           | -   | 0.05                    | <b>0.22<sup>+</sup></b> | 0.07                                         | <b>0.28<sup>+</sup></b> | <b>0.36<sup>+</sup></b> | -           | -    | -   | 0.03                    | 0.01 | <b>0.27<sup>+</sup></b> | 0.05                | -    | 0.04 | <b>0.23<sup>+</sup></b> | <b>0.34<sup>+</sup></b> |
| 'Okinazakura'/翁桜 (Cer031a)                       | -                                         | -   | -   | -   | -           | -   | -           | -   | -   | -   | ○                                           | -           | -   | 0.05                    | <b>0.22<sup>+</sup></b> | 0.07                                         | <b>0.28<sup>+</sup></b> | <b>0.36<sup>+</sup></b> | -           | -    | -   | 0.03                    | 0.01 | <b>0.27<sup>+</sup></b> | 0.05                | -    | 0.04 | <b>0.23<sup>+</sup></b> | <b>0.34<sup>+</sup></b> |
| 'Sirayuki'/白雪 (Cer031a)                          | -                                         | -   | -   | -   | -           | -   | -           | -   | -   | -   | ○                                           | -           | -   | 0.05                    | <b>0.22<sup>+</sup></b> | 0.07                                         | <b>0.28<sup>+</sup></b> | <b>0.36<sup>+</sup></b> | -           | -    | -   | 0.03                    | 0.01 | <b>0.27<sup>+</sup></b> | 0.05                | -    | 0.04 | <b>0.23<sup>+</sup></b> | <b>0.34<sup>+</sup></b> |
| 'Sirayuki'/白雪 (Cer031b)                          | -                                         | -   | -   | -   | -           | -   | -           | -   | -   | -   | ○                                           | -           | -   | 0.04                    | <b>0.20<sup>+</sup></b> | 0.07                                         | <b>0.27<sup>+</sup></b> | <b>0.41<sup>†</sup></b> | -           | -    | -   | 0.03                    | 0.02 | <b>0.22<sup>+</sup></b> | 0.05                | -    | 0.04 | <b>0.23<sup>+</sup></b> | <b>0.39<sup>†</sup></b> |
| 'Nigrescens'/薄墨 (Cer032a-i)                      | -                                         | -   | -   | -   | -           | -   | -           | -   | -   | -   | ○                                           | -           | -   | <b>0.12<sup>+</sup></b> | 0.08                    | 0.07                                         | <b>0.18<sup>+</sup></b> | <b>0.54<sup>†</sup></b> | -           | -    | -   | <b>0.11<sup>+</sup></b> | -    | <b>0.15<sup>+</sup></b> | 0.01                | -    | 0.03 | 0.15                    | <b>0.53<sup>†</sup></b> |
| 'Nigrescens'/薄墨 (Cer032a-ii)                     | -                                         | -   | -   | -   | -           | -   | -           | -   | -   | -   | ○                                           | -           | -   | <b>0.12<sup>+</sup></b> | 0.08                    | 0.06                                         | <b>0.18<sup>+</sup></b> | <b>0.54<sup>†</sup></b> | -           | -    | -   | <b>0.11<sup>+</sup></b> | -    | <b>0.15<sup>+</sup></b> | 0.01                | -    | 0.03 | 0.15                    | <b>0.53<sup>†</sup></b> |
| 'Nigrescens'/薄墨 (Cer032b)                        | -                                         | -   | -   | -   | -           | -   | -           | -   | -   | -   | ○                                           | -           | -   | <b>0.10<sup>+</sup></b> | 0.10                    | <b>0.12<sup>+</sup></b>                      | <b>0.15<sup>+</sup></b> | <b>0.52<sup>†</sup></b> | -           | -    | -   | <b>0.09<sup>+</sup></b> | -    | <b>0.17<sup>+</sup></b> | 0.01                | 0.01 | 0.06 | 0.12                    | <b>0.51<sup>†</sup></b> |
| 'Nigrescens'/薄墨 (Cer032c)                        | -                                         | -   | -   | -   | -           | -   | -           | -   | -   | -   | ○                                           | -           | -   | <b>0.12<sup>+</sup></b> | <b>0.15<sup>+</sup></b> | 0.08                                         | 0.13                    | <b>0.51<sup>†</sup></b> | -           | -    | -   | <b>0.11<sup>+</sup></b> | 0.01 | <b>0.18<sup>+</sup></b> | 0.06                | 0.02 | 0.02 | 0.10                    | <b>0.49<sup>†</sup></b> |
| 'Shibayama'/芝山 (Cer033)                          | -                                         | -   | -   | -   | -           | ○   | -           | -   | -   | -   | ○                                           | -           | -   | 0.05                    | <b>0.12<sup>+</sup></b> | 0.03                                         | <b>0.25<sup>+</sup></b> | <b>0.54<sup>†</sup></b> | -           | -    | -   | 0.04                    | -    | <b>0.15<sup>+</sup></b> | 0.02                | -    | 0.02 | <b>0.23<sup>+</sup></b> | <b>0.52<sup>†</sup></b> |
| 'Shibayama'/芝山 (Cer034)                          | -                                         | -   | -   | -   | -           | ○   | -           | -   | -   | -   | ○                                           | -           | -   | <b>0.12<sup>+</sup></b> | <b>0.07<sup>+</sup></b> | 0.06                                         | <b>0.18<sup>+</sup></b> | <b>0.55<sup>†</sup></b> | -           | -    | -   | <b>0.10<sup>+</sup></b> | -    | <b>0.14<sup>+</sup></b> | -                   | -    | 0.04 | 0.14                    | <b>0.54<sup>†</sup></b> |
| 'Amayadori'/雨宿 (Cer035-i)                        | -                                         | ○   | -   | -   | -           | -   | -           | -   | -   | -   | ○                                           | -           | -   | -                       | 0.03                    | 0.06                                         | <b>0.13<sup>+</sup></b> | <b>0.76<sup>‡</sup></b> | -           | -    | -   | -                       | -    | 0.06                    | 0.02                | 0.01 | 0.02 | 0.12                    | <b>0.76<sup>‡</sup></b> |
| 'Sirotae'/白妙 (Cer035-i)                          | -                                         | ○   | -   | -   | -           | -   | -           | -   | -   | -   | ○                                           | -           | -   | -                       | 0.03                    | 0.06                                         | <b>0.13<sup>+</sup></b> | <b>0.76<sup>‡</sup></b> | -           | -    | -   | -                       | -    | 0.06                    | 0.02                | 0.01 | 0.02 | 0.12                    | <b>0.76<sup>‡</sup></b> |
| 'Sirotae'/白妙 (Cer035-ii)                         | -                                         | ○   | -   | -   | -           | -   | -           | -   | -   | -   | ○                                           | -           | -   | -                       | 0.03                    | 0.05                                         | <b>0.13<sup>+</sup></b> | <b>0.77<sup>‡</sup></b> | -           | -    | -   | -                       | -    | 0.06                    | 0.02                | 0.01 | 0.02 | 0.12                    | <b>0.76<sup>‡</sup></b> |
| 'Daimin'/大明 (Cer036)                             | -                                         | ○   | -   | -   | -           | -   | -           | -   | -   | -   | ○                                           | -           | -   | 0.02                    | <b>0.10<sup>+</sup></b> | 0.04                                         | <b>0.19<sup>+</sup></b> | <b>0.65<sup>‡</sup></b> | -           | -    | -   | 0.02                    | -    | 0.06                    | 0.03                | -    | 0.07 | <b>0.16<sup>+</sup></b> | <b>0.63<sup>†</sup></b> |
| 'Wasinowo'/鷺の尾 (Cer036)                          | -                                         | ○   | -   | -   | -           | -   | -           | -   | -   | -   | ○                                           | -           | -   | 0.02                    | <b>0.10<sup>+</sup></b> | 0.04                                         | <b>0.19<sup>+</sup></b> | <b>0.65<sup>‡</sup></b> | -           | -    | -   | 0.02                    | -    | 0.06                    | 0.03                | -    | 0.07 | <b>0.16<sup>+</sup></b> | <b>0.63<sup>†</sup></b> |
| 'Komatunagi'/駒繫 (Cer037-i)                       | -                                         | ○   | -   | -   | -           | -   | -           | -   | -   | -   | ○                                           | -           | -   | -                       | 0.04                    | 0.02                                         | <b>0.39<sup>+</sup></b> | <b>0.55<sup>†</sup></b> | -           | -    | -   | -                       | -    | 0.02                    | 0.04                | -    | 0.01 | <b>0.37<sup>+</sup></b> | <b>0.54<sup>†</sup></b> |
| 'Taihaku'/太白 (Cer037-i)                          | -                                         | ○   | -   | -   | -           | -   | -           | -   | -   | -   | ○                                           | -           | -   | -                       | 0.04                    | 0.02                                         | <b>0.39<sup>+</sup></b> | <b>0.55<sup>†</sup></b> | -           | -    | -   | -                       | -    | 0.02                    | 0.04                | -    | 0.01 | <b>0.37<sup>+</sup></b> | <b>0.54<sup>†</sup></b> |
| 'Kurumadome'/車駐 (Cer037-ii)                      | -                                         | ○   | -   | -   | -           | -   | -           | -   | -   | -   | ○                                           | -           | -   | -                       | 0.04                    | 0.02                                         | <b>0.39<sup>+</sup></b> | <b>0.55<sup>†</sup></b> | -           | -    | -   | -                       | -    | 0.04                    | 0.03                | -    | -    | <b>0.37<sup>+</sup></b> | <b>0.54<sup>†</sup></b> |
| 'Moutan'/牡丹 (Cer038)                             | -                                         | ○   | -   | -   | -           | -   | -           | -   | -   | -   | ○                                           | -           | -   | -                       | 0.02                    | 0.02                                         | <b>0.31<sup>+</sup></b> | <b>0.64<sup>‡</sup></b> | -           | -    | -   | -                       | -    | -                       | 0.02                | -    | 0.02 | <b>0.29<sup>+</sup></b> | <b>0.63<sup>†</sup></b> |

Online Resource 5. (continued)

| Scientific name/Japanese name<br>(New clone no.) | Morphological classification <sup>a</sup> |     |     |     |             |     |             |     |     |     |     | STRUCTURE analysis ( $K = 7$ ) <sup>b</sup> |      |             |                          |                          | STRUCTURE analysis ( $K = 11$ ) <sup>b</sup> |                          |             |      |      |      |      |                          |                          |      |                          |                          |                          |
|--------------------------------------------------|-------------------------------------------|-----|-----|-----|-------------|-----|-------------|-----|-----|-----|-----|---------------------------------------------|------|-------------|--------------------------|--------------------------|----------------------------------------------|--------------------------|-------------|------|------|------|------|--------------------------|--------------------------|------|--------------------------|--------------------------|--------------------------|
|                                                  | cam                                       | pse | pen | ape | ape.<br>pil | inc | inc.<br>kin | nip | sar | ver | jam | lan.<br>spe                                 | max  | cam/<br>pse | pen                      | ape/<br>inc/<br>nip      | sar/<br>ver                                  | jam                      | lan.<br>spe | max  | cam  | pse  | pen  | ape                      | ape.<br>pil/<br>inc      | nip  | sar                      | ver                      | jam                      |
| 'Multiplex'/真桜 (Cer039-i)                        | -                                         | ○   | -   | -   | -           | -   | -           | -   | -   | -   | ○   | -                                           | -    | -           | <b>0.11</b> <sup>+</sup> | 0.07                     | <b>0.24</b> <sup>+</sup>                     | <b>0.57</b> <sup>†</sup> | 0.01        | -    | -    | -    | -    | <b>0.17</b> <sup>+</sup> | 0.01                     | -    | 0.04                     | <b>0.20</b> <sup>+</sup> | <b>0.55</b> <sup>†</sup> |
| 'Candida'/有明 (Cer039-ii)                         | -                                         | ○   | -   | -   | -           | -   | -           | -   | -   | -   | ○   | 0.01                                        | -    | -           | 0.09                     | 0.08                     | <b>0.24</b> <sup>+</sup>                     | <b>0.57</b> <sup>†</sup> | 0.02        | -    | -    | -    | -    | <b>0.15</b> <sup>+</sup> | 0.01                     | -    | 0.05                     | <b>0.21</b> <sup>+</sup> | <b>0.55</b> <sup>†</sup> |
| 'Ojochin'/大提灯 (Cer039-iii)                       | -                                         | ○   | -   | -   | -           | -   | -           | -   | -   | -   | ○   | 0.01                                        | -    | -           | 0.09                     | 0.08                     | <b>0.24</b> <sup>+</sup>                     | <b>0.57</b> <sup>†</sup> | 0.02        | -    | -    | -    | -    | <b>0.15</b> <sup>+</sup> | 0.01                     | -    | 0.05                     | <b>0.21</b> <sup>+</sup> | <b>0.55</b> <sup>†</sup> |
| 'Senriko'/千里香 (Cer039-iii)                       | -                                         | ○   | -   | -   | -           | -   | -           | -   | -   | -   | ○   | 0.01                                        | -    | -           | 0.09                     | 0.08                     | <b>0.24</b> <sup>+</sup>                     | <b>0.57</b> <sup>†</sup> | 0.02        | -    | -    | -    | -    | <b>0.15</b> <sup>+</sup> | 0.01                     | -    | 0.05                     | <b>0.21</b> <sup>+</sup> | <b>0.55</b> <sup>†</sup> |
| 'Ojochin'/大提灯 (Cer039-iii)                       | -                                         | ○   | -   | -   | -           | -   | -           | -   | -   | -   | ○   | 0.01                                        | -    | -           | <b>0.10</b> <sup>+</sup> | 0.07                     | <b>0.23</b> <sup>+</sup>                     | <b>0.59</b> <sup>†</sup> | 0.01        | -    | -    | -    | -    | <b>0.15</b> <sup>+</sup> | 0.01                     | -    | 0.04                     | <b>0.19</b> <sup>+</sup> | <b>0.57</b> <sup>†</sup> |
| 'Senriko'/千里香 (Cer039-iii)                       | -                                         | ○   | -   | -   | -           | -   | -           | -   | -   | -   | ○   | 0.01                                        | -    | -           | <b>0.10</b> <sup>+</sup> | 0.07                     | <b>0.23</b> <sup>+</sup>                     | <b>0.59</b> <sup>†</sup> | 0.01        | -    | -    | -    | -    | <b>0.15</b> <sup>+</sup> | 0.01                     | -    | 0.04                     | <b>0.19</b> <sup>+</sup> | <b>0.57</b> <sup>†</sup> |
| 'Candida'/有明 (Cer039-iv)                         | -                                         | ○   | -   | -   | -           | -   | -           | -   | -   | -   | ○   | 0.01                                        | -    | -           | 0.07                     | 0.06                     | <b>0.23</b> <sup>+</sup>                     | <b>0.61</b> <sup>†</sup> | 0.02        | -    | -    | -    | -    | <b>0.14</b> <sup>+</sup> | -                        | -    | 0.03                     | <b>0.20</b> <sup>+</sup> | <b>0.60</b> <sup>†</sup> |
| 'Gosho-mikurumagaeshi'/御所御車返し (Cer040)           | -                                         | -   | -   | -   | -           | -   | -           | ○   | -   | ○   | ○   | -                                           | -    | -           | 0.04                     | 0.02                     | <b>0.33</b> <sup>+</sup>                     | <b>0.58</b> <sup>†</sup> | -           | -    | -    | -    | -    | 0.08                     | -                        | -    | -                        | <b>0.30</b> <sup>+</sup> | <b>0.58</b> <sup>†</sup> |
| 'Hirano-nezame'/平野寝覚 (Cer041)                    | -                                         | -   | -   | -   | -           | -   | -           | ○   | -   | ○   | ○   | -                                           | 0.03 | -           | 0.04                     | <b>0.16</b> <sup>+</sup> | <b>0.39</b> <sup>+</sup>                     | <b>0.36</b> <sup>+</sup> | -           | -    | 0.03 | -    | 0.01 | 0.06                     | 0.03                     | 0.05 | 0.08                     | <b>0.37</b> <sup>+</sup> | <b>0.35</b> <sup>†</sup> |
| 'Imose'/妹背 (Cer042)                              | -                                         | -   | -   | -   | -           | -   | -           | ○   | -   | ○   | ○   | 0.01                                        | 0.01 | 0.02        | <b>0.20</b> <sup>+</sup> | 0.03                     | <b>0.32</b> <sup>+</sup>                     | <b>0.41</b> <sup>†</sup> | -           | -    | 0.02 | 0.01 | -    | 0.06                     | 0.16                     | -    | 0.02                     | <b>0.31</b> <sup>+</sup> | <b>0.40</b> <sup>†</sup> |
| 'Juzukakezakura'/梅護寺数珠掛桜 (Cer043)                | -                                         | -   | -   | -   | -           | -   | -           | ○   | -   | ○   | ○   | 0.01                                        | -    | -           | 0.07                     | 0.14                     | <b>0.45</b> <sup>†</sup>                     | <b>0.32</b> <sup>+</sup> | -           | -    | -    | -    | -    | 0.13                     | 0.04                     | 0.03 | 0.04                     | <b>0.43</b> <sup>+</sup> | <b>0.31</b> <sup>†</sup> |
| 'Tsukubane'/突羽根 (Cer043)                         | -                                         | -   | -   | -   | -           | -   | -           | ○   | -   | ○   | ○   | 0.01                                        | -    | -           | 0.07                     | 0.14                     | <b>0.45</b> <sup>†</sup>                     | <b>0.32</b> <sup>+</sup> | -           | -    | -    | -    | -    | 0.13                     | 0.04                     | 0.03 | 0.04                     | <b>0.43</b> <sup>+</sup> | <b>0.31</b> <sup>†</sup> |
| 'Kibune-uzu'/貴船雲珠 (Cer044)                       | -                                         | -   | -   | -   | -           | -   | -           | -   | -   | -   | ○   | -                                           | -    | -           | 0.04                     | 0.06                     | <b>0.59</b> <sup>†</sup>                     | <b>0.30</b> <sup>+</sup> | -           | -    | -    | -    | -    | 0.02                     | 0.06                     | 0.05 | 0.01                     | <b>0.55</b> <sup>†</sup> | <b>0.29</b> <sup>†</sup> |
| 'Omuro-ariake'/御室有明 (Cer044)                     | -                                         | -   | -   | -   | -           | -   | -           | ○   | -   | ○   | ○   | -                                           | -    | -           | 0.04                     | 0.06                     | <b>0.59</b> <sup>†</sup>                     | <b>0.30</b> <sup>+</sup> | -           | -    | -    | -    | -    | 0.02                     | 0.06                     | 0.05 | 0.01                     | <b>0.55</b> <sup>†</sup> | <b>0.29</b> <sup>†</sup> |
| 'Kinashi-chigozakura'/鬼無稚児桜 (Cer045-i)           | -                                         | -   | -   | -   | -           | -   | -           | ○   | -   | ○   | ○   | -                                           | -    | -           | <b>0.16</b> <sup>+</sup> | 0.02                     | <b>0.38</b> <sup>+</sup>                     | <b>0.43</b> <sup>†</sup> | -           | -    | -    | -    | -    | 0.06                     | 0.13                     | -    | -                        | <b>0.37</b> <sup>+</sup> | <b>0.41</b> <sup>†</sup> |
| 'Kinashi-chigozakura'/鬼無稚児桜 (Cer045-ii)          | -                                         | -   | -   | -   | -           | -   | -           | ○   | -   | ○   | ○   | -                                           | -    | -           | <b>0.15</b> <sup>+</sup> | 0.02                     | <b>0.39</b> <sup>+</sup>                     | <b>0.43</b> <sup>†</sup> | -           | -    | -    | -    | -    | 0.07                     | 0.11                     | -    | -                        | <b>0.38</b> <sup>+</sup> | <b>0.42</b> <sup>†</sup> |
| 'Nison-in'/二尊院普賢象 (Cer045-ii)                    | -                                         | -   | -   | -   | -           | -   | -           | ○   | -   | ○   | ○   | -                                           | -    | -           | <b>0.15</b> <sup>+</sup> | 0.02                     | <b>0.39</b> <sup>+</sup>                     | <b>0.43</b> <sup>†</sup> | -           | -    | -    | -    | -    | 0.07                     | 0.11                     | -    | -                        | <b>0.38</b> <sup>+</sup> | <b>0.42</b> <sup>†</sup> |
| 'Kodaiji'/高台寺 (Cer046)                           | -                                         | -   | -   | -   | -           | -   | -           | -   | -   | -   | ○   | -                                           | -    | -           | 0.04                     | <b>0.12</b> <sup>+</sup> | <b>0.34</b> <sup>†</sup>                     | <b>0.48</b> <sup>†</sup> | -           | -    | -    | -    | -    | 0.03                     | 0.02                     | -    | <b>0.12</b> <sup>+</sup> | <b>0.34</b> <sup>†</sup> | <b>0.47</b> <sup>†</sup> |
| 'Ohsawazakura'/大沢桜 (Cer047)                      | -                                         | -   | -   | -   | -           | -   | -           | ○   | -   | ○   | ○   | 0.01                                        | -    | -           | 0.11                     | 0.02                     | <b>0.41</b> <sup>†</sup>                     | <b>0.44</b> <sup>†</sup> | -           | -    | -    | -    | -    | 0.06                     | 0.10                     | -    | -                        | <b>0.39</b> <sup>+</sup> | <b>0.42</b> <sup>†</sup> |
| 'Shonaden'/小南殿 (Cer047)                          | -                                         | -   | -   | -   | -           | -   | -           | -   | -   | -   | ○   | 0.01                                        | -    | -           | 0.11                     | 0.02                     | <b>0.41</b> <sup>†</sup>                     | <b>0.44</b> <sup>†</sup> | -           | -    | -    | -    | -    | 0.06                     | 0.10                     | -    | -                        | <b>0.39</b> <sup>+</sup> | <b>0.42</b> <sup>†</sup> |
| 'Taoyame'/手弱女 (Cer048)                           | -                                         | -   | -   | -   | -           | -   | -           | ○   | -   | ○   | ○   | -                                           | -    | -           | 0.02                     | 0.12                     | <b>0.32</b> <sup>†</sup>                     | <b>0.53</b> <sup>†</sup> | -           | -    | -    | -    | -    | 0.03                     | 0.05                     | 0.01 | 0.06                     | <b>0.30</b> <sup>+</sup> | <b>0.52</b> <sup>†</sup> |
| 'Yadakemurasaki'/矢岳紫 (Cer049)                    | -                                         | -   | -   | -   | -           | -   | -           | -   | -   | -   | ○   | -                                           | -    | -           | 0.06                     | 0.03                     | <b>0.57</b> <sup>†</sup>                     | <b>0.33</b> <sup>+</sup> | -           | -    | -    | -    | 0.01 | 0.05                     | 0.03                     | 0.01 | 0.01                     | <b>0.56</b> <sup>†</sup> | <b>0.31</b> <sup>†</sup> |
| 'Aratama'/新珠 (Cer050)                            | -                                         | ○   | -   | -   | -           | -   | -           | -   | -   | -   | ○   | -                                           | 0.01 | -           | 0.02                     | <b>0.18</b> <sup>+</sup> | <b>0.34</b> <sup>†</sup>                     | <b>0.44</b> <sup>†</sup> | -           | 0.02 | -    | -    | 0.01 | 0.02                     | 0.02                     | 0.05 | 0.09                     | <b>0.34</b> <sup>†</sup> | <b>0.43</b> <sup>†</sup> |
| 'Beni-tamanishiki'/紅玉錦 (Cer051)                  | -                                         | -   | -   | -   | -           | -   | -           | ○   | -   | ○   | ○   | -                                           | -    | -           | 0.09                     | 0.22                     | <b>0.31</b> <sup>†</sup>                     | <b>0.36</b> <sup>+</sup> | -           | -    | -    | -    | 0.01 | 0.02                     | 0.16                     | 0.03 | 0.13                     | <b>0.26</b> <sup>†</sup> | <b>0.37</b> <sup>†</sup> |
| 'Beni-yutaka'/紅豊 (Cer053)                        | -                                         | -   | -   | ○   | -           | -   | -           | ○   | -   | ○   | ○   | -                                           | -    | 0.02        | 0.06                     | <b>0.17</b> <sup>†</sup> | <b>0.13</b> <sup>†</sup>                     | <b>0.61</b> <sup>†</sup> | -           | -    | -    | 0.01 | -    | 0.14                     | 0.02                     | 0.06 | 0.06                     | 0.10                     | <b>0.60</b> <sup>†</sup> |
| 'Hanagasa'/花笠 (Cer054)                           | -                                         | -   | -   | -   | -           | -   | -           | -   | -   | -   | ○   | -                                           | -    | -           | 0.05                     | <b>0.21</b> <sup>†</sup> | <b>0.25</b> <sup>†</sup>                     | <b>0.48</b> <sup>†</sup> | -           | -    | -    | -    | -    | <b>0.18</b> <sup>+</sup> | 0.02                     | -    | 0.08                     | <b>0.21</b> <sup>†</sup> | <b>0.47</b> <sup>†</sup> |
| 'Matsumae-benihigoromo'/松前紅緋衣 (Cer055)           | -                                         | -   | -   | -   | -           | -   | ○           | -   | -   | -   | ○   | -                                           | -    | -           | 0.18                     | 0.11                     | 0.04                                         | <b>0.66</b> <sup>†</sup> | -           | -    | -    | -    | -    | 0.13                     | 0.06                     | 0.13 | 0.01                     | 0.02                     | <b>0.63</b> <sup>†</sup> |
| 'Matsumae-benitamae'/松前紅珠恵 (Cer056)              | -                                         | -   | -   | -   | -           | -   | -           | -   | -   | -   | -   | -                                           | -    | -           | 0.09                     | 0.10                     | <b>0.23</b> <sup>†</sup>                     | <b>0.56</b> <sup>†</sup> | -           | -    | -    | -    | -    | 0.03                     | 0.11                     | 0.02 | 0.06                     | <b>0.21</b> <sup>†</sup> | <b>0.55</b> <sup>†</sup> |
| 'Matsumae-hanazomei'/松前花染衣 (Cer057)              | -                                         | -   | -   | -   | -           | -   | -           | -   | -   | -   | ○   | 0.01                                        | -    | -           | <b>0.21</b> <sup>†</sup> | 0.05                     | <b>0.27</b> <sup>†</sup>                     | <b>0.45</b> <sup>†</sup> | -           | -    | -    | -    | 0.02 | 0.07                     | 0.17                     | -    | 0.02                     | <b>0.26</b> <sup>†</sup> | <b>0.44</b> <sup>†</sup> |
| 'Matsumae-hayazaki'/松前早咲 (Cer058-i)              | -                                         | -   | -   | ○   | -           | -   | -           | -   | -   | -   | ○   | -                                           | -    | 0.02        | <b>0.18</b> <sup>†</sup> | 0.07                     | <b>0.22</b> <sup>†</sup>                     | <b>0.51</b> <sup>†</sup> | -           | -    | 0.01 | -    | -    | <b>0.18</b> <sup>†</sup> | 0.02                     | 0.08 | -                        | <b>0.19</b> <sup>†</sup> | <b>0.48</b> <sup>†</sup> |
| 'Matsumae-hayazaki'/松前早咲 (Cer058-ii)             | -                                         | -   | -   | ○   | -           | -   | -           | -   | -   | -   | ○   | -                                           | -    | 0.01        | <b>0.21</b> <sup>†</sup> | 0.07                     | <b>0.22</b> <sup>†</sup>                     | <b>0.48</b> <sup>†</sup> | -           | -    | 0.01 | -    | -    | <b>0.20</b> <sup>†</sup> | 0.04                     | 0.08 | 0.01                     | <b>0.19</b> <sup>†</sup> | <b>0.46</b> <sup>†</sup> |
| 'Matsumae-sarasa'/松前更紗 (Cer059)                  | -                                         | -   | -   | ○   | -           | -   | -           | -   | -   | -   | ○   | -                                           | 0.01 | -           | <b>0.16</b> <sup>†</sup> | <b>0.22</b> <sup>†</sup> | <b>0.17</b> <sup>†</sup>                     | <b>0.43</b> <sup>†</sup> | -           | -    | -    | -    | -    | <b>0.17</b> <sup>†</sup> | 0.08                     | 0.14 | 0.06                     | 0.10                     | <b>0.43</b> <sup>†</sup> |
| 'Shizuka'/静香 (Cer060)                            | -                                         | ○   | -   | -   | -           | -   | -           | -   | -   | -   | ○   | 0.01                                        | -    | 0.02        | 0.08                     | 0.09                     | <b>0.22</b> <sup>†</sup>                     | <b>0.57</b> <sup>†</sup> | -           | -    | -    | -    | -    | <b>0.19</b> <sup>†</sup> | 0.03                     | -    | 0.02                     | 0.16                     | <b>0.56</b> <sup>†</sup> |
| 'Chihara-zakura'/千原桜 (Cer061)                    | -                                         | -   | -   | -   | -           | -   | -           | ○   | -   | ○   | ○   | -                                           | 0.01 | -           | <b>0.27</b> <sup>†</sup> | -                        | <b>0.45</b> <sup>†</sup>                     | <b>0.26</b> <sup>†</sup> | -           | 0.01 | -    | -    | 0.03 | 0.05                     | 0.14                     | -    | -                        | <b>0.47</b> <sup>†</sup> | <b>0.26</b> <sup>†</sup> |
| 'Fudanzakura'/不断桜 (Cer062)                       | -                                         | -   | -   | -   | -           | -   | -           | ○   | -   | ○   | ○   | 0.05                                        | -    | -           | 0.03                     | 0.03                     | <b>0.48</b> <sup>†</sup>                     | <b>0.40</b> <sup>†</sup> | 0.05        | -    | 0.01 | -    | 0.02 | 0.01                     | -                        | -    | 0.04                     | <b>0.46</b> <sup>†</sup> | <b>0.38</b> <sup>†</sup> |
| 'Gosho-odora'/御所匂 (Cer063)                       | -                                         | -   | -   | -   | -           | -   | -           | -   | -   | -   | -   | -                                           | -    | -           | 0.03                     | <b>0.32</b> <sup>†</sup> | 0.13                                         | <b>0.51</b> <sup>†</sup> | -           | -    | -    | -    | -    | 0.05                     | -                        | -    | <b>0.34</b> <sup>†</sup> | 0.06                     | <b>0.51</b> <sup>†</sup> |
| 'Goten-nioi'/御殿匂 (Cer064)                        | -                                         | -   | -   | -   | -           | -   | -           | ○   | -   | ○   | ○   | -                                           | 0.01 | -           | 0.14                     | 0.09                     | <b>0.39</b> <sup>†</sup>                     | <b>0.35</b> <sup>†</sup> | -           | -    | 0.02 | -    | -    | 0.12                     | 0.07                     | 0.01 | 0.04                     | <b>0.38</b> <sup>†</sup> | <b>0.34</b> <sup>†</sup> |
| 'Iyo-kumagai'/伊予熊谷 (Cer065)                      | -                                         | -   | -   | -   | -           | -   | -           | -   | -   | -   | ○   | -                                           | -    | -           | 0.09                     | 0.06                     | <b>0.27</b> <sup>†</sup>                     | <b>0.56</b> <sup>†</sup> | -           | -    | -    | -    | -    | 0.10                     | 0.03                     | -    | 0.04                     | <b>0.26</b> <sup>†</sup> | <b>0.55</b> <sup>†</sup> |
| 'Mirabilis'/大村桜 (Cer066)                         | -                                         | -   | -   | -   | -           | -   | -           | ○   | -   | ○   | ○   | -                                           | -    | -           | <b>0.18</b> <sup>†</sup> | 0.02                     | <b>0.46</b> <sup>†</sup>                     | <b>0.32</b> <sup>†</sup> | -           | -    | -    | -    | -    | 0.09                     | <b>0.13</b> <sup>†</sup> | -    | -                        | <b>0.44</b> <sup>†</sup> | <b>0.30</b> <sup>†</sup> |
| 'Mitsukabizakura'/三ヶ日桜 (Cer067)                  | -                                         | -   | -   | -   | -           | -   | -           | -   | -   | -   | ○   | 0.01                                        | -    | -           | 0.06                     | 0.07                     | <b>0.32</b> <sup>†</sup>                     | <b>0.52</b> <sup>†</sup> | -           | -    | -    | -    | -    | 0.07                     | 0.01                     | -    | 0.07                     | <b>0.31</b> <sup>†</sup> | <b>0.51</b> <sup>†</sup> |

Online Resource 5. (continued)

| Scientific name/Japanese name<br>(New clone no.) | Morphological classification <sup>a</sup> |     |     |     |             |     |             |     |     |     |     |                          |             | STRUCTURE analysis ( $K = 7$ ) <sup>b</sup> |                          |                          |                          |                          |             | STRUCTURE analysis ( $K = 11$ ) <sup>b</sup> |      |                          |                          |                          |                          |                          |                          |                          |                          |                          |  |
|--------------------------------------------------|-------------------------------------------|-----|-----|-----|-------------|-----|-------------|-----|-----|-----|-----|--------------------------|-------------|---------------------------------------------|--------------------------|--------------------------|--------------------------|--------------------------|-------------|----------------------------------------------|------|--------------------------|--------------------------|--------------------------|--------------------------|--------------------------|--------------------------|--------------------------|--------------------------|--------------------------|--|
|                                                  | cam                                       | pse | pen | ape | ape.<br>pil | inc | inc.<br>kin | nip | sar | ver | jam | lan.<br>spe              | lan.<br>spe | cam/<br>pse                                 | pen                      | ape/<br>inc/<br>nip      | sar/<br>ver              | jam                      | lan.<br>spe | max                                          | cam  | pse                      | pen                      | ape                      | ape.<br>pil/<br>inc      | nip                      | sar                      | ver                      | jam                      | lan.<br>spe              |  |
| 'Multipetala'/名島桜 (Cer068)                       | -                                         | -   | -   | -   | -           | -   | -           | -   | ○   | -   | ○   | 0.01                     | 0.02        | 0.01                                        | <b>0.16</b> <sup>+</sup> | 0.13                     | <b>0.24</b> <sup>+</sup> | <b>0.42</b> <sup>†</sup> | -           | -                                            | 0.01 | -                        | 0.02                     | <b>0.26</b> <sup>+</sup> | 0.02                     | 0.04                     | 0.05                     | <b>0.18</b> <sup>+</sup> | <b>0.40</b> <sup>†</sup> |                          |  |
| 'Ohta-zakura'/太田桜 (Cer069)                       | -                                         | -   | -   | -   | -           | -   | -           | -   | ○   | -   | ○   | 0.01                     | 0.02        | 0.03                                        | 0.06                     | <b>0.49</b> <sup>†</sup> | <b>0.21</b> <sup>†</sup> | <b>0.17</b> <sup>†</sup> | -           | -                                            | 0.01 | 0.01                     | -                        | 0.09                     | 0.05                     | -                        | <b>0.54</b> <sup>†</sup> | 0.11                     | <b>0.17</b> <sup>†</sup> |                          |  |
| 'Oshusatozakura'/奥州里桜 (Cer070)                   | -                                         | -   | -   | -   | -           | -   | -           | ○   | -   | -   | ○   | -                        | -           | -                                           | 0.08                     | <b>0.54</b> <sup>†</sup> | 0.03                     | <b>0.33</b> <sup>+</sup> | -           | -                                            | -    | -                        | 0.01                     | 0.12                     | 0.02                     | <b>0.48</b> <sup>†</sup> | 0.02                     | 0.02                     | <b>0.31</b> <sup>†</sup> |                          |  |
| 'Polycarpa'/福桜 (Cer071)                          | -                                         | -   | -   | -   | -           | -   | -           | -   | ○   | -   | ○   | -                        | -           | -                                           | 0.04                     | <b>0.20</b> <sup>+</sup> | <b>0.46</b> <sup>†</sup> | <b>0.29</b> <sup>†</sup> | -           | -                                            | -    | -                        | -                        | 0.10                     | -                        | 0.01                     | 0.12                     | <b>0.45</b> <sup>†</sup> | <b>0.29</b> <sup>†</sup> |                          |  |
| 'Sendai-shidare'/仙台枝垂 (Cer072)                   | -                                         | -   | -   | -   | -           | -   | -           | ○   | -   | -   | ○   | -                        | -           | -                                           | 0.05                     | 0.08                     | <b>0.43</b> <sup>†</sup> | <b>0.42</b> <sup>†</sup> | -           | -                                            | -    | -                        | 0.01                     | 0.03                     | 0.02                     | -                        | 0.06                     | <b>0.42</b> <sup>†</sup> | <b>0.42</b> <sup>†</sup> |                          |  |
| 'Sphaerantha'/兼六園菊桜 (Cer073)                     | -                                         | -   | -   | -   | -           | -   | -           | -   | -   | -   | -   | 0.04                     | -           | -                                           | 0.09                     | 0.03                     | <b>0.49</b> <sup>†</sup> | <b>0.33</b> <sup>+</sup> | 0.02        | -                                            | -    | -                        | 0.02                     | 0.13                     | 0.01                     | -                        | -                        | <b>0.46</b> <sup>†</sup> | <b>0.33</b> <sup>+</sup> |                          |  |
| 'Tokyo'/東京桜 (Cer074)                             | -                                         | -   | -   | -   | -           | -   | -           | -   | -   | -   | ○   | -                        | 0.01        | 0.03                                        | 0.05                     | <b>0.25</b> <sup>†</sup> | <b>0.22</b> <sup>†</sup> | <b>0.43</b> <sup>†</sup> | -           | 0.01                                         | -    | 0.02                     | -                        | 0.15                     | 0.04                     | 0.07                     | 0.10                     | <b>0.18</b> <sup>†</sup> | <b>0.43</b> <sup>†</sup> |                          |  |
| 'Vexillifera'/白山旗桜 (Cer075)                      | -                                         | -   | -   | -   | -           | -   | -           | -   | -   | -   | ○   | -                        | -           | 0.02                                        | 0.08                     | 0.03                     | <b>0.21</b> <sup>†</sup> | <b>0.65</b> <sup>†</sup> | -           | -                                            | -    | 0.01                     | 0.02                     | 0.08                     | 0.04                     | 0.01                     | 0.01                     | 0.18                     | <b>0.64</b> <sup>†</sup> |                          |  |
| 'Yaenioi'/八重匂 (Cer076)                           | -                                         | -   | -   | -   | -           | -   | -           | -   | -   | -   | ○   | -                        | 0.01        | -                                           | 0.03                     | 0.02                     | <b>0.31</b> <sup>†</sup> | <b>0.62</b> <sup>†</sup> | -           | 0.01                                         | -    | -                        | -                        | 0.07                     | -                        | -                        | -                        | <b>0.28</b> <sup>†</sup> | <b>0.61</b> <sup>†</sup> |                          |  |
| <b>Prunus lannesiana var. speciosa</b>           |                                           |     |     |     |             |     |             |     |     |     |     |                          |             |                                             |                          |                          |                          |                          |             |                                              |      |                          |                          |                          |                          |                          |                          |                          |                          |                          |  |
| 'Akami-ohshima'/赤実大島 (Cer077)                    | -                                         | -   | -   | -   | -           | -   | -           | -   | -   | -   | ○   | -                        | -           | -                                           | -                        | 0.03                     | 0.02                     | <b>0.93</b> <sup>‡</sup> | -           | -                                            | -    | -                        | -                        | -                        | -                        | -                        | 0.04                     | -                        | 0.01                     | <b>0.91</b> <sup>‡</sup> |  |
| 'Formosa'/潮風桜 (Cer078)                           | -                                         | -   | -   | -   | -           | -   | -           | -   | -   | -   | ○   | 0.01                     | 0.01        | 0.02                                        | 0.06                     | 0.03                     | <b>0.28</b> <sup>†</sup> | <b>0.58</b> <sup>†</sup> | -           | -                                            | -    | 0.01                     | 0.01                     | 0.09                     | 0.01                     | 0.01                     | 0.02                     | <b>0.26</b> <sup>†</sup> | <b>0.57</b> <sup>†</sup> |                          |  |
| 'Glauca'/水上 (Cer079)                             | -                                         | -   | -   | -   | -           | -   | -           | -   | -   | -   | ○   | -                        | 0.01        | 0.01                                        | 0.02                     | 0.03                     | <b>0.13</b> <sup>†</sup> | <b>0.79</b> <sup>‡</sup> | -           | -                                            | -    | -                        | -                        | 0.05                     | 0.01                     | 0.01                     | 0.01                     | 0.09                     | <b>0.78</b> <sup>‡</sup> |                          |  |
| 'Izuzakura'/伊豆桜 (Cer080)                         | -                                         | -   | -   | -   | -           | -   | -           | -   | -   | -   | ○   | -                        | -           | -                                           | 0.02                     | 0.02                     | 0.04                     | <b>0.90</b> <sup>‡</sup> | -           | -                                            | -    | -                        | -                        | 0.02                     | 0.02                     | 0.01                     | 0.02                     | 0.03                     | <b>0.88</b> <sup>‡</sup> |                          |  |
| 'Kanzaki-ohshima'/寒咲大島 (Cer081)                  | -                                         | -   | -   | -   | -           | -   | -           | -   | -   | -   | ○   | -                        | -           | 0.02                                        | 0.03                     | 0.06                     | 0.01                     | <b>0.87</b> <sup>‡</sup> | -           | -                                            | -    | 0.02                     | -                        | 0.02                     | 0.03                     | 0.05                     | 0.02                     | 0.01                     | <b>0.84</b> <sup>‡</sup> |                          |  |
| 'Plena'/八重大島桜 (Cer082)                           | -                                         | -   | -   | -   | -           | -   | -           | -   | -   | -   | ○   | -                        | -           | -                                           | -                        | -                        | -                        | <b>0.97</b> <sup>‡</sup> | -           | -                                            | -    | -                        | -                        | -                        | 0.02                     | 0.01                     | -                        | -                        | <b>0.93</b> <sup>‡</sup> |                          |  |
| 'Semiplena'/薄重大島 (Cer083)                        | -                                         | -   | -   | -   | -           | -   | -           | -   | -   | -   | ○   | -                        | -           | -                                           | -                        | -                        | -                        | <b>0.98</b> <sup>‡</sup> | -           | -                                            | -    | -                        | -                        | -                        | -                        | -                        | -                        | -                        | <b>0.98</b> <sup>‡</sup> |                          |  |
| 'Semiplena'/薄重大島 (Cer084)                        | -                                         | -   | -   | -   | -           | -   | -           | -   | -   | -   | ○   | 0.01                     | -           | <b>0.20</b> <sup>+</sup>                    | 0.02                     | 0.02                     | 0.08                     | <b>0.66</b> <sup>‡</sup> | -           | 0.02                                         | -    | <b>0.19</b> <sup>+</sup> | -                        | 0.03                     | 0.01                     | 0.01                     | 0.01                     | 0.06                     | <b>0.64</b> <sup>†</sup> |                          |  |
| 'Shin-sumizome'/新墨染 (Cer085)                     | -                                         | -   | -   | -   | -           | -   | -           | -   | -   | -   | ○   | -                        | -           | -                                           | -                        | 0.01                     | -                        | <b>0.96</b> <sup>‡</sup> | -           | 0.01                                         | -    | -                        | -                        | -                        | -                        | -                        | 0.02                     | -                        | <b>0.93</b> <sup>‡</sup> |                          |  |
| 'Yaebeni-ohshima'/八重紅大島 (Cer086)                 | -                                         | -   | -   | -   | -           | -   | -           | -   | -   | -   | ○   | -                        | -           | -                                           | -                        | -                        | -                        | <b>0.97</b> <sup>‡</sup> | -           | -                                            | -    | -                        | -                        | -                        | 0.01                     | 0.01                     | -                        | -                        | <b>0.94</b> <sup>‡</sup> |                          |  |
| 'Yaebeni-ohshima'/八重紅大島 (Cer087)                 | -                                         | -   | -   | -   | -           | -   | -           | -   | -   | -   | ○   | -                        | -           | -                                           | 0.02                     | 0.03                     | 0.04                     | <b>0.90</b> <sup>‡</sup> | -           | 0.01                                         | -    | -                        | -                        | 0.04                     | 0.02                     | 0.02                     | 0.04                     | 0.02                     | <b>0.84</b> <sup>‡</sup> |                          |  |
| <b>Prunus jamasakura</b>                         |                                           |     |     |     |             |     |             |     |     |     |     |                          |             |                                             |                          |                          |                          |                          |             |                                              |      |                          |                          |                          |                          |                          |                          |                          |                          |                          |  |
| 'Agishi-kogikuzakura'/阿岸小菊桜 (Cer088)             | -                                         | -   | -   | -   | -           | -   | -           | -   | -   | ○   | -   | -                        | 0.01        | -                                           | 0.02                     | <b>0.17</b> <sup>†</sup> | <b>0.73</b> <sup>‡</sup> | 0.05                     | -           | -                                            | 0.01 | -                        | 0.04                     | -                        | 0.12                     | 0.02                     | <b>0.72</b> <sup>‡</sup> | 0.06                     |                          |                          |  |
| 'Beninanden'/紅南殿 (Cer089-i)                      | -                                         | -   | -   | -   | -           | -   | -           | -   | -   | ○   | -   | 0.01                     | -           | -                                           | 0.10                     | 0.05                     | <b>0.53</b> <sup>†</sup> | <b>0.30</b> <sup>†</sup> | -           | 0.01                                         | -    | -                        | -                        | 0.10                     | 0.10                     | 0.02                     | -                        | <b>0.48</b> <sup>†</sup> | <b>0.26</b> <sup>†</sup> |                          |  |
| 'Beninanden'/紅南殿 (Cer089-ii)                     | -                                         | -   | -   | -   | -           | -   | -           | -   | -   | ○   | -   | -                        | -           | -                                           | 0.09                     | 0.04                     | <b>0.53</b> <sup>†</sup> | <b>0.31</b> <sup>†</sup> | -           | 0.01                                         | -    | -                        | -                        | 0.07                     | 0.10                     | 0.01                     | -                        | <b>0.48</b> <sup>†</sup> | <b>0.30</b> <sup>†</sup> |                          |  |
| 'Fomasa'/八重左近桜 (Cer090)                          | -                                         | -   | -   | -   | -           | -   | -           | -   | -   | ○   | -   | -                        | 0.01        | -                                           | <b>0.21</b> <sup>†</sup> | 0.04                     | <b>0.57</b> <sup>†</sup> | <b>0.16</b> <sup>†</sup> | -           | -                                            | 0.02 | -                        | 0.02                     | 0.02                     | <b>0.15</b> <sup>†</sup> | -                        | 0.05                     | <b>0.58</b> <sup>†</sup> | <b>0.15</b> <sup>†</sup> |                          |  |
| 'Gijozakura'/祇王寺祇女桜 (Cer091)                     | -                                         | -   | -   | -   | -           | -   | -           | -   | -   | ○   | -   | 0.04                     | -           | -                                           | 0.03                     | <b>0.24</b> <sup>†</sup> | <b>0.18</b> <sup>†</sup> | <b>0.49</b> <sup>†</sup> | 0.03        | -                                            | -    | -                        | -                        | 0.05                     | -                        | -                        | <b>0.22</b> <sup>†</sup> | <b>0.17</b> <sup>†</sup> | <b>0.49</b> <sup>†</sup> |                          |  |
| 'Goshinzakura'/御信桜 (Cer092)                      | -                                         | -   | -   | -   | -           | -   | -           | -   | -   | ○   | -   | <b>0.06</b> <sup>†</sup> | -           | -                                           | 0.03                     | <b>0.12</b> <sup>†</sup> | <b>0.67</b> <sup>‡</sup> | 0.10                     | 0.05        | -                                            | -    | -                        | 0.10                     | 0.02                     | 0.02                     | 0.04                     | <b>0.67</b> <sup>†</sup> | 0.09                     |                          |                          |  |
| 'Hiyoshizakura'/日吉桜 (Cer092)                     | -                                         | -   | -   | -   | -           | -   | -           | -   | -   | ○   | -   | <b>0.06</b> <sup>†</sup> | -           | -                                           | 0.03                     | <b>0.12</b> <sup>†</sup> | <b>0.67</b> <sup>‡</sup> | 0.10                     | 0.05        | -                                            | -    | -                        | 0.10                     | 0.02                     | 0.02                     | 0.04                     | <b>0.67</b> <sup>†</sup> | 0.09                     |                          |                          |  |
| 'Haguiensis'/気多の白菊桜 (Cer093)                     | -                                         | -   | -   | -   | -           | -   | -           | -   | -   | ○   | -   | 0.02                     | 0.03        | 0.04                                        | 0.14                     | 0.12                     | <b>0.48</b> <sup>†</sup> | <b>0.16</b> <sup>†</sup> | 0.02        | 0.02                                         | 0.02 | 0.04                     | 0.02                     | 0.07                     | 0.02                     | -                        | 0.17                     | <b>0.47</b> <sup>†</sup> | <b>0.15</b> <sup>†</sup> |                          |  |
| 'Heteroflora'/二度桜 (Cer094)                       | -                                         | -   | -   | -   | -           | -   | -           | -   | -   | ○   | -   | -                        | -           | -                                           | 0.03                     | 0.02                     | <b>0.83</b> <sup>‡</sup> | 0.10                     | -           | -                                            | -    | -                        | 0.01                     | -                        | 0.02                     | -                        | 0.02                     | <b>0.84</b> <sup>‡</sup> | 0.09                     |                          |  |
| 'Hiuchidani-kikuzakura'/火打谷菊桜 (Cer095)           | -                                         | -   | -   | -   | -           | -   | -           | -   | -   | ○   | -   | -                        | -           | -                                           | <b>0.18</b> <sup>†</sup> | 0.04                     | <b>0.44</b> <sup>†</sup> | <b>0.33</b> <sup>†</sup> | -           | -                                            | -    | -                        | 0.02                     | 0.17                     | -                        | -                        | 0.03                     | <b>0.42</b> <sup>†</sup> | <b>0.32</b> <sup>†</sup> |                          |  |
| 'Humilis'/稚木の桜 (Cer096)                          | -                                         | -   | -   | -   | -           | -   | -           | -   | -   | ○   | -   | 0.01                     | -           | -                                           | 0.01                     | 0.03                     | <b>0.81</b> <sup>‡</sup> | 0.12                     | 0.01        | -                                            | -    | -                        | 0.03                     | -                        | 0.11                     | -                        | <b>0.75</b> <sup>‡</sup> | 0.07                     |                          |                          |  |
| 'Ichi-hara'/市原虎の尾 (Cer097)                       | -                                         | -   | -   | -   | -           | -   | -           | -   | -   | ○   | -   | -                        | -           | -                                           | 0.03                     | <b>0.21</b> <sup>†</sup> | <b>0.73</b> <sup>‡</sup> | -                        | -           | -                                            | 0.01 | -                        | 0.06                     | 0.04                     | 0.12                     | 0.06                     | <b>0.69</b> <sup>‡</sup> | -                        |                          |                          |  |
| 'Imperialis'/内裏の桜 (Cer098)                       | -                                         | -   | -   | -   | -           | -   | -           | -   | -   | ○   | -   | -                        | 0.03        | 0.01                                        | 0.02                     | 0.02                     | <b>0.77</b> <sup>‡</sup> | 0.14                     | -           | -                                            | 0.05 | -                        | 0.01                     | 0.02                     | 0.04                     | -                        | <b>0.75</b> <sup>‡</sup> | 0.08                     |                          |                          |  |
| 'Iyo-usuzumi'/伊予薄墨 (Cer099)                      | -                                         | -   | -   | -   | -           | -   | -           | -   | -   | ○   | -   | 0.02                     | 0.05        | -                                           | <b>0.14</b> <sup>†</sup> | 0.04                     | <b>0.71</b> <sup>‡</sup> | 0.04                     | -           | -                                            | 0.04 | -                        | 0.06                     | 0.14                     | 0.02                     | 0.01                     | 0.01                     | <b>0.67</b> <sup>†</sup> | 0.03                     |                          |  |
| 'Kongo'/金剛桜 (Cer100)                             | -                                         | -   | -   | -   | -           | -   | -           | -   | -   | ○   | -   | -                        | 0.02        | -                                           | 0.07                     | 0.07                     | <b>0.52</b> <sup>†</sup> | <b>0.30</b> <sup>†</sup> | -           | -                                            | 0.04 | -                        | -                        | 0.07                     | 0.01                     | 0.01                     | 0.05                     | <b>0.51</b> <sup>†</sup> | <b>0.29</b> <sup>†</sup> |                          |  |
| 'Kotohira'/琴平 (Cer101)                           | -                                         | -   | -   | -   | -           | -   | -           | -   | -   | ○   | -   | -                        | -           | -                                           | 0.07                     | <b>0.31</b> <sup>†</sup> | <b>0.26</b> <sup>†</sup> | <b>0.33</b> <sup>†</sup> | -           | -                                            | -    | -                        | 0.01                     | 0.07                     | 0.06                     | 0.03                     | <b>0.23</b> <sup>†</sup> | <b>0.26</b> <sup>†</sup> | <b>0.32</b> <sup>†</sup> |                          |  |
| 'Nahohiana'/木の花桜 (Cer102)                        | -                                         | -   | -   | -   | -           | -   | -           | -   | -   | ○   | -   | -                        | 0.01        | 0.01                                        | <b>0.23</b> <sup>†</sup> | -                        | <b>0.73</b> <sup>‡</sup> | -                        | 0.01        | -                                            | 0.03 | 0.02                     | <b>0.16</b> <sup>†</sup> | 0.02                     | 0.02                     | 0.02                     | -                        | <b>0.71</b> <sup>‡</sup> | -                        |                          |  |

Online Resource 5. (continued)

| Scientific name/Japanese name<br>(New clone no.) | Morphological classification <sup>a</sup> |     |     |     |             |     |             |     |     |     |     | STRUCTURE analysis ( $K = 7$ ) <sup>b</sup> |      |                         |                         |                         | STRUCTURE analysis ( $K = 11$ ) <sup>b</sup> |                         |                         |      |      |                         |                         |                         |                         |                         |                         |                         |                         |                         |
|--------------------------------------------------|-------------------------------------------|-----|-----|-----|-------------|-----|-------------|-----|-----|-----|-----|---------------------------------------------|------|-------------------------|-------------------------|-------------------------|----------------------------------------------|-------------------------|-------------------------|------|------|-------------------------|-------------------------|-------------------------|-------------------------|-------------------------|-------------------------|-------------------------|-------------------------|-------------------------|
|                                                  | cam                                       | pse | pen | ape | ape.<br>pil | inc | inc.<br>kin | nip | sar | ver | jam | lan.<br>spe                                 | max  | cam/<br>pse             | pen                     | ape/<br>inc/<br>nip     | sar/<br>ver                                  | jam                     | lan.<br>spe             | max  | cam  | pse                     | pen                     | ape                     | ape.<br>pil/<br>inc     | nip                     | sar                     | ver                     | jam                     | lan.<br>spe             |
| 'Octopes'/八房桜 (Cer103)                           | -                                         | -   | -   | -   | -           | -   | -           | -   | -   | ○   | -   | -                                           | -    | -                       | 0.05                    | 0.02                    | <b>0.47<sup>†</sup></b>                      | <b>0.45<sup>†</sup></b> | -                       | -    | -    | -                       | 0.01                    | -                       | 0.06                    | -                       | 0.03                    | <b>0.44<sup>†</sup></b> | <b>0.44<sup>†</sup></b> |                         |
| 'Raikouji-kikuzakura'/来迎寺菊桜 (Cer104)             | -                                         | -   | -   | -   | -           | -   | -           | -   | -   | ○   | -   | -                                           | -    | -                       | 0.06                    | 0.13                    | <b>0.60<sup>†</sup></b>                      | <b>0.18<sup>†</sup></b> | -                       | -    | -    | -                       | 0.01                    | 0.07                    | 0.03                    | 0.03                    | 0.08                    | <b>0.58<sup>†</sup></b> | <b>0.18<sup>†</sup></b> |                         |
| 'Sanozakura'/佐野桜 (Cer105)                        | -                                         | -   | -   | -   | -           | -   | -           | -   | -   | ○   | -   | -                                           | -    | 0.02                    | 0.07                    | 0.04                    | <b>0.60<sup>†</sup></b>                      | <b>0.27<sup>†</sup></b> | -                       | -    | -    | 0.01                    | 0.01                    | 0.06                    | 0.02                    | 0.01                    | 0.03                    | <b>0.59<sup>†</sup></b> | <b>0.25<sup>†</sup></b> |                         |
| 'Sendaiya'/仙台屋 (Cer106)                          | -                                         | -   | -   | -   | -           | -   | -           | -   | -   | ○   | -   | -                                           | -    | -                       | 0.01                    | 0.09                    | 0.05                                         | <b>0.47<sup>†</sup></b> | <b>0.36<sup>†</sup></b> | -    | -    | -                       | -                       | 0.01                    | 0.02                    | 0.01                    | -                       | 0.13                    | <b>0.44<sup>†</sup></b> | <b>0.34<sup>†</sup></b> |
| 'Sunpu-zakura'/駿府桜 (Cer107)                      | -                                         | -   | -   | -   | -           | -   | -           | -   | -   | ○   | -   | -                                           | -    | -                       | <b>0.39<sup>†</sup></b> | 0.06                    | 0.02                                         | <b>0.30<sup>†</sup></b> | <b>0.22<sup>†</sup></b> | -    | -    | -                       | <b>0.39<sup>†</sup></b> | 0.02                    | 0.05                    | 0.02                    | -                       | 0.02                    | <b>0.28<sup>†</sup></b> | <b>0.21<sup>†</sup></b> |
| <b><i>Prunus sargentii</i></b>                   |                                           |     |     |     |             |     |             |     |     |     |     |                                             |      |                         |                         |                         |                                              |                         |                         |      |      |                         |                         |                         |                         |                         |                         |                         |                         |                         |
| 'Kushiroyaе'/釧路八重 (Cer108)                       | -                                         | -   | -   | -   | -           | -   | -           | ○   | -   | -   | -   | -                                           | -    | -                       | -                       | -                       | <b>0.87<sup>‡</sup></b>                      | -                       | 0.10                    | -    | -    | -                       | -                       | -                       | -                       | <b>0.92<sup>‡</sup></b> | -                       | -                       | 0.03                    |                         |
| <b><i>Prunus verecunda</i></b>                   |                                           |     |     |     |             |     |             |     |     |     |     |                                             |      |                         |                         |                         |                                              |                         |                         |      |      |                         |                         |                         |                         |                         |                         |                         |                         |                         |
| 'Antiqua'/奈良の八重桜 (Cer109)                        | -                                         | -   | -   | -   | -           | -   | -           | -   | ○   | -   | -   | 0.03                                        | -    | -                       | <b>0.13<sup>†</sup></b> | <b>0.80<sup>‡</sup></b> | 0.01                                         | -                       | 0.02                    | -    | -    | -                       | 0.05                    | 0.08                    | 0.05                    | 0.02                    | <b>0.72<sup>‡</sup></b> | 0.03                    | -                       |                         |
| 'Antiqua'/奈良の八重桜 (Cer110)                        | -                                         | -   | -   | -   | -           | -   | -           | -   | ○   | -   | -   | -                                           | -    | -                       | -                       | -                       | <b>0.84<sup>‡</sup></b>                      | 0.01                    | -                       | -    | -    | -                       | <b>0.11<sup>†</sup></b> | 0.04                    | 0.01                    | 0.02                    | <b>0.78<sup>‡</sup></b> | 0.02                    | -                       |                         |
| 'Kanzashi-zakura'/簪桜 (Cer111)                    | -                                         | -   | -   | -   | -           | -   | -           | -   | -   | -   | -   | 0.01                                        | 0.02 | 0.01                    | 0.06                    | <b>0.46<sup>†</sup></b> | 0.05                                         | <b>0.38<sup>†</sup></b> | -                       | -    | 0.02 | 0.01                    | 0.01                    | 0.11                    | 0.03                    | 0.09                    | <b>0.31<sup>†</sup></b> | 0.03                    | <b>0.38<sup>†</sup></b> |                         |
| 'Norioi'/片丘桜 (Cer112)                            | -                                         | -   | -   | -   | -           | -   | -           | -   | ○   | -   | -   | 0.02                                        | 0.04 | -                       | 0.11                    | <b>0.81<sup>‡</sup></b> | 0.01                                         | -                       | -                       | 0.04 | -    | -                       | 0.03                    | 0.12                    | 0.02                    | 0.04                    | <b>0.71<sup>†</sup></b> | 0.02                    | -                       |                         |
| 'Pendula'/霧降桜 (Cer113)                           | -                                         | -   | -   | -   | -           | -   | -           | -   | ○   | -   | -   | 0.15                                        | 0.01 | 0.01                    | 0.09                    | <b>0.62<sup>†</sup></b> | 0.10                                         | -                       | <b>0.17<sup>†</sup></b> | -    | -    | -                       | 0.06                    | 0.03                    | -                       | 0.02                    | <b>0.61<sup>†</sup></b> | 0.07                    | 0.01                    |                         |
| <b><i>Prunus xsieboldii</i></b>                  |                                           |     |     |     |             |     |             |     |     |     |     |                                             |      |                         |                         |                         |                                              |                         |                         |      |      |                         |                         |                         |                         |                         |                         |                         |                         |                         |
| 'Caespitosa'/高砂 (Cer114-i)                       | -                                         | -   | -   | ○   | -           | -   | -           | -   | -   | -   | ○   | 0.02                                        | 0.04 | -                       | <b>0.14<sup>†</sup></b> | <b>0.30<sup>†</sup></b> | <b>0.18<sup>†</sup></b>                      | <b>0.32<sup>†</sup></b> | -                       | -    | -    | -                       | -                       | <b>0.25<sup>†</sup></b> | 0.01                    | 0.03                    | <b>0.22<sup>†</sup></b> | <b>0.16<sup>†</sup></b> | <b>0.31<sup>†</sup></b> |                         |
| 'Caespitosa'/高砂 (Cer114-ii)                      | -                                         | -   | -   | ○   | -           | -   | -           | -   | -   | -   | ○   | 0.01                                        | 0.04 | -                       | <b>0.15<sup>†</sup></b> | <b>0.28<sup>†</sup></b> | <b>0.20<sup>†</sup></b>                      | <b>0.32<sup>†</sup></b> | -                       | -    | -    | -                       | -                       | <b>0.25<sup>†</sup></b> | 0.01                    | 0.03                    | <b>0.19<sup>†</sup></b> | <b>0.19<sup>†</sup></b> | <b>0.30<sup>†</sup></b> |                         |
| <b><i>Prunus apetala var. pilosa</i></b>         |                                           |     |     |     |             |     |             |     |     |     |     |                                             |      |                         |                         |                         |                                              |                         |                         |      |      |                         |                         |                         |                         |                         |                         |                         |                         |                         |
| 'Multipetala'/雛菊桜 (Cer115)                       | -                                         | -   | -   | -   | ○           | -   | -           | -   | -   | -   | -   | 0.01                                        | -    | -                       | <b>0.66<sup>†</sup></b> | 0.10                    | 0.19                                         | 0.04                    | -                       | -    | -    | -                       | 0.02                    | <b>0.74<sup>†</sup></b> | 0.03                    | -                       | 0.03                    | 0.15                    | -                       |                         |
| <b><i>Prunus incisa var. incisa</i></b>          |                                           |     |     |     |             |     |             |     |     |     |     |                                             |      |                         |                         |                         |                                              |                         |                         |      |      |                         |                         |                         |                         |                         |                         |                         |                         |                         |
| 'Bellura'/朝露桜 (Cer116)                           | -                                         | -   | -   | -   | ○           | -   | -           | -   | -   | -   | -   | 0.02                                        | 0.01 | -                       | <b>0.14<sup>†</sup></b> | <b>0.26<sup>†</sup></b> | <b>0.21<sup>†</sup></b>                      | <b>0.35<sup>†</sup></b> | 0.03                    | -    | -    | -                       | 0.01                    | <b>0.26<sup>†</sup></b> | 0.06                    | 0.03                    | 0.07                    | <b>0.16<sup>†</sup></b> | <b>0.35<sup>†</sup></b> |                         |
| 'Fujikikuzakura'/富士菊桜 (Cer117)                   | -                                         | -   | -   | -   | ○           | -   | -           | -   | -   | -   | -   | 0.03                                        | 0.06 | -                       | <b>0.52<sup>†</sup></b> | <b>0.25<sup>†</sup></b> | 0.09                                         | 0.04                    | 0.02                    | 0.02 | 0.02 | -                       | 0.03                    | <b>0.66<sup>†</sup></b> | 0.04                    | 0.11                    | 0.03                    | 0.04                    | 0.02                    |                         |
| 'Longipes'/長柄の豆桜 (Cer118)                        | -                                         | -   | -   | -   | ○           | -   | -           | -   | -   | -   | -   | -                                           | -    | <b>0.35<sup>†</sup></b> | 0.11                    | <b>0.29<sup>†</sup></b> | 0.02                                         | <b>0.21<sup>†</sup></b> | -                       | -    | -    | <b>0.35<sup>†</sup></b> | 0.03                    | 0.16                    | 0.03                    | 0.03                    | <b>0.16<sup>†</sup></b> | 0.01                    | <b>0.21<sup>†</sup></b> |                         |
| 'Oshidori'/鴛鴦桜 (Cer119)                          | -                                         | -   | -   | -   | ○           | -   | -           | -   | -   | -   | -   | 0.01                                        | 0.03 | 0.03                    | <b>0.31<sup>†</sup></b> | <b>0.31<sup>†</sup></b> | 0.02                                         | <b>0.28<sup>†</sup></b> | -                       | -    | 0.02 | 0.01                    | 0.10                    | <b>0.43<sup>†</sup></b> | 0.02                    | 0.02                    | 0.14                    | 0.01                    | <b>0.23<sup>†</sup></b> |                         |
| 'Plena'/八重の豆桜 (Cer120)                           | -                                         | -   | -   | -   | ○           | -   | -           | -   | -   | -   | -   | 0.01                                        | 0.05 | -                       | <b>0.53<sup>†</sup></b> | 0.16                    | 0.07                                         | 0.17                    | -                       | -    | 0.04 | -                       | 0.05                    | <b>0.59<sup>†</sup></b> | 0.05                    | 0.09                    | 0.01                    | 0.05                    | 0.10                    |                         |
| 'Urceolata'/大花豆桜 (Cer121)                        | -                                         | -   | -   | -   | ○           | -   | -           | -   | -   | -   | -   | 0.02                                        | -    | <b>0.12<sup>†</sup></b> | <b>0.20<sup>†</sup></b> | 0.06                    | 0.01                                         | <b>0.58<sup>†</sup></b> | 0.01                    | -    | -    | 0.10                    | -                       | <b>0.19<sup>†</sup></b> | 0.03                    | 0.08                    | -                       | -                       | <b>0.55<sup>†</sup></b> |                         |
| 'Urceolata'/大花豆桜 (Cer122)                        | -                                         | -   | -   | -   | ○           | -   | -           | -   | -   | -   | -   | 0.03                                        | -    | -                       | <b>0.27<sup>†</sup></b> | 0.03                    | 0.11                                         | <b>0.55<sup>†</sup></b> | 0.01                    | -    | -    | -                       | -                       | <b>0.28<sup>†</sup></b> | 0.05                    | 0.03                    | -                       | 0.07                    | <b>0.53<sup>†</sup></b> |                         |
| 'Urceolata'/大花豆桜 (Cer123)                        | -                                         | -   | -   | -   | ○           | -   | -           | -   | -   | -   | -   | 0.03                                        | 0.03 | 0.01                    | <b>0.57<sup>†</sup></b> | 0.18                    | <b>0.10<sup>†</sup></b>                      | 0.08                    | 0.02                    | -    | 0.01 | -                       | 0.09                    | <b>0.56<sup>†</sup></b> | <b>0.17<sup>†</sup></b> | 0.04                    | 0.01                    | 0.05                    | 0.03                    |                         |
| 'Yamadei'/緑桜 (Cer124)                            | -                                         | -   | -   | -   | ○           | -   | -           | -   | -   | -   | -   | 0.05                                        | -    | -                       | <b>0.48<sup>†</sup></b> | 0.23                    | <b>0.20<sup>†</sup></b>                      | 0.02                    | 0.03                    | -    | -    | -                       | -                       | <b>0.53<sup>†</sup></b> | 0.16                    | 0.09                    | 0.02                    | <b>0.13<sup>†</sup></b> | 0.02                    |                         |
| <b><i>Prunus incisa var. kinkiensis</i></b>      |                                           |     |     |     |             |     |             |     |     |     |     |                                             |      |                         |                         |                         |                                              |                         |                         |      |      |                         |                         |                         |                         |                         |                         |                         |                         |                         |
| 'Viridicalyx'/緑近畿豆桜 (Cer125)                     | -                                         | -   | -   | -   | -           | ○   | -           | -   | -   | -   | -   | 0.03                                        | -    | -                       | <b>0.63<sup>†</sup></b> | 0.25                    | 0.04                                         | 0.04                    | 0.02                    | -    | -    | -                       | 0.12                    | <b>0.42<sup>†</sup></b> | 0.19                    | 0.04                    | 0.10                    | 0.05                    | 0.04                    |                         |
| 'Viridicalyx'/緑近畿豆桜 (Cer126)                     | -                                         | -   | -   | -   | -           | ○   | -           | -   | -   | -   | -   | 0.02                                        | -    | -                       | <b>0.61<sup>†</sup></b> | <b>0.31<sup>†</sup></b> | 0.02                                         | 0.04                    | 0.01                    | -    | -    | -                       | <b>0.23<sup>†</sup></b> | <b>0.51<sup>†</sup></b> | 0.02                    | 0.16                    | 0.03                    | 0.01                    | 0.02                    |                         |
| <b><i>Prunus xparvifolia</i></b>                 |                                           |     |     |     |             |     |             |     |     |     |     |                                             |      |                         |                         |                         |                                              |                         |                         |      |      |                         |                         |                         |                         |                         |                         |                         |                         |                         |
| 'Globosa'/飴玉桜 (Cer127)                           | -                                         | -   | -   | -   | ○           | -   | -           | -   | -   | -   | ○   | -                                           | -    | -                       | 0.07                    | <b>0.28<sup>†</sup></b> | <b>0.36<sup>†</sup></b>                      | <b>0.28<sup>†</sup></b> | -                       | -    | -    | -                       | -                       | <b>0.15<sup>†</sup></b> | 0.02                    | 0.06                    | <b>0.15<sup>†</sup></b> | <b>0.34<sup>†</sup></b> | <b>0.28<sup>†</sup></b> |                         |
| 'Pendula'/枝垂小葉桜 (Cer128)                         | -                                         | -   | -   | -   | ○           | -   | -           | -   | -   | ○   | ○   | 0.01                                        | 0.01 | <b>0.09<sup>†</sup></b> | 0.14                    | <b>0.17<sup>†</sup></b> | <b>0.19<sup>†</sup></b>                      | <b>0.39<sup>†</sup></b> | -                       | 0.01 | -    | 0.06                    | 0.02                    | 0.23                    | 0.07                    | 0.08                    | -                       | 0.14                    | <b>0.37<sup>†</sup></b> |                         |
| 'Parvifolia'/冬桜 (Cer129)                         | -                                         | -   | -   | -   | ○           | -   | -           | -   | -   | ○   | ○   | -                                           | 0.03 | 0.02                    | 0.07                    | <b>0.23<sup>†</sup></b> | <b>0.42<sup>†</sup></b>                      | <b>0.23<sup>†</sup></b> | -                       | -    | -    | 0.01                    | 0.01                    | <b>0.37<sup>†</sup></b> | 0.01                    | 0.03                    | 0.02                    | <b>0.34<sup>†</sup></b> | <b>0.20<sup>†</sup></b> |                         |
| 'Umineko'/海猫 (Cer130)                            | -                                         | -   | -   | -   | ○           | -   | -           | -   | -   | ○   | ○   | -                                           | -    | 0.01                    | 0.08                    | <b>0.24<sup>†</sup></b> | 0.03                                         | <b>0.63<sup>†</sup></b> | -                       | -    | -    | -                       | -                       | <b>0.24<sup>†</sup></b> | 0.03                    | 0.05                    | 0.05                    | 0.02                    | <b>0.59<sup>†</sup></b> |                         |
| <b><i>Prunus xfuruseana</i></b>                  |                                           |     |     |     |             |     |             |     |     |     |     |                                             |      |                         |                         |                         |                                              |                         |                         |      |      |                         |                         |                         |                         |                         |                         |                         |                         |                         |
| 'Incisoides'/雪洞桜 (Cer131)                        | -                                         | -   | -   | -   | ○           | -   | -           | -   | -   | ○   | -   | 0.01                                        | 0.02 | 0.01                    | <b>0.13<sup>†</sup></b> | <b>0.20<sup>†</sup></b> | 0.08                                         | <b>0.54<sup>†</sup></b> | -                       | -    | 0.02 | -                       | 0.06                    | 0.12                    | 0.04                    | 0.06                    | 0.09                    | 0.06                    | <b>0.54<sup>†</sup></b> |                         |

Online Resource 5. (continued)

| Scientific name/Japanese name<br>(New clone no.) | Morphological classification <sup>a</sup> |     |     |     |             |     |             |     |     |     |     |                         | STRUCTURE analysis ( $K = 7$ ) <sup>b</sup> |                         |                         |                         |                         |                         | STRUCTURE analysis ( $K = 11$ ) <sup>b</sup> |      |      |                         |                         |                         |                         |                         |                         |                         |                         |                         |
|--------------------------------------------------|-------------------------------------------|-----|-----|-----|-------------|-----|-------------|-----|-----|-----|-----|-------------------------|---------------------------------------------|-------------------------|-------------------------|-------------------------|-------------------------|-------------------------|----------------------------------------------|------|------|-------------------------|-------------------------|-------------------------|-------------------------|-------------------------|-------------------------|-------------------------|-------------------------|-------------------------|
|                                                  | cam                                       | pse | pen | ape | ape.<br>pil | inc | inc.<br>kin | nip | sar | ver | jam | lan.<br>spe             | max                                         | cam/<br>pse             | pen                     | ape/<br>inc/<br>nip     | sar/<br>ver             | jam                     | lan.<br>spe                                  | max  | cam  | pse                     | pen                     | ape                     | ape.<br>pil/<br>inc     | nip                     | sar                     | ver                     | jam                     | lan.<br>spe             |
| <b><i>Prunus xsyodoi</i></b>                     |                                           |     |     |     |             |     |             |     |     |     |     |                         |                                             |                         |                         |                         |                         |                         |                                              |      |      |                         |                         |                         |                         |                         |                         |                         |                         |                         |
| 'Ganman-zakura'/含満桜 (Cer132)                     | -                                         | -   | -   | -   | -           | ○   | -           | -   | ○   | -   | -   | 0.02                    | -                                           | -                       | <b>0.44<sup>+</sup></b> | <b>0.38<sup>+</sup></b> | <b>0.14<sup>+</sup></b> | -                       | -                                            | -    | -    | -                       | <b>0.42<sup>+</sup></b> | 0.07                    | <b>0.36<sup>+</sup></b> | -                       | <b>0.11<sup>+</sup></b> | -                       |                         |                         |
| 'Shodoi'/勝道桜 (Cer133)                            | -                                         | -   | -   | -   | -           | ○   | -           | -   | ○   | -   | -   | 0.01                    | -                                           | <b>0.31<sup>+</sup></b> | 0.13                    | 0.20                    | 0.12                    | <b>0.22<sup>+</sup></b> | 0.02                                         | -    | -    | <b>0.30<sup>+</sup></b> | 0.01                    | <b>0.31<sup>+</sup></b> | 0.02                    | 0.05                    | 0.04                    | 0.04                    | <b>0.21<sup>+</sup></b> |                         |
| <b><i>Prunus xtajimensis</i></b>                 |                                           |     |     |     |             |     |             |     |     |     |     |                         |                                             |                         |                         |                         |                         |                         |                                              |      |      |                         |                         |                         |                         |                         |                         |                         |                         |                         |
| 'Tajimensis'/湯村 (Cer134)                         | -                                         | -   | -   | -   | -           | -   | -           | -   | -   | -   | -   | 0.04                    | 0.05                                        | -                       | <b>0.19<sup>+</sup></b> | 0.07                    | <b>0.64<sup>†</sup></b> | -                       | 0.02                                         | -    | 0.06 | -                       | 0.02                    | 0.24                    | 0.02                    | 0.03                    | 0.02                    | <b>0.58<sup>†</sup></b> | -                       |                         |
| <b><i>Prunus xsubhirtella</i></b>                |                                           |     |     |     |             |     |             |     |     |     |     |                         |                                             |                         |                         |                         |                         |                         |                                              |      |      |                         |                         |                         |                         |                         |                         |                         |                         |                         |
| 'Autumnalis'/十月桜 (Cer135)                        | -                                         | ○   | -   | -   | ○           | -   | -           | -   | -   | -   | -   | 0.01                    | 0.02                                        | <b>0.21<sup>+</sup></b> | <b>0.18<sup>+</sup></b> | 0.01                    | <b>0.25<sup>+</sup></b> | <b>0.31<sup>+</sup></b> | -                                            | -    | 0.04 | <b>0.20<sup>+</sup></b> | -                       | <b>0.27<sup>+</sup></b> | -                       | -                       | -                       | <b>0.18<sup>+</sup></b> | <b>0.28<sup>+</sup></b> |                         |
| 'Autumnalis'/十月桜 (Cer136)                        | -                                         | ○   | -   | -   | ○           | -   | -           | -   | -   | -   | -   | -                       | 0.02                                        | <b>0.40<sup>†</sup></b> | <b>0.25<sup>+</sup></b> | <b>0.16<sup>+</sup></b> | 0.10                    | <b>0.07<sup>+</sup></b> | -                                            | -    | 0.02 | <b>0.39<sup>+</sup></b> | 0.01                    | <b>0.38<sup>+</sup></b> | 0.01                    | 0.03                    | -                       | 0.08                    | 0.06                    |                         |
| 'Autumnalis'/十月桜 (Cer137)                        | -                                         | ○   | -   | -   | ○           | -   | -           | -   | -   | -   | -   | -                       | 0.05                                        | <b>0.45<sup>†</sup></b> | <b>0.26<sup>+</sup></b> | 0.12                    | 0.09                    | 0.02                    | -                                            | -    | 0.05 | <b>0.45<sup>†</sup></b> | 0.02                    | <b>0.31<sup>+</sup></b> | 0.02                    | 0.04                    | 0.01                    | 0.07                    | 0.01                    |                         |
| 'Shofukuji'/正福寺桜 (Cer138a-i)                     | -                                         | -   | -   | -   | -           | ○   | -           | -   | -   | -   | ○   | -                       | 0.03                                        | <b>0.50<sup>†</sup></b> | <b>0.25<sup>+</sup></b> | 0.13                    | 0.04                    | 0.03                    | -                                            | -    | 0.01 | <b>0.48<sup>†</sup></b> | -                       | <b>0.39<sup>+</sup></b> | 0.02                    | 0.02                    | 0.03                    | -                       | 0.03                    |                         |
| 'Shofukuji'/正福寺桜 (Cer138a-ii)                    | -                                         | -   | -   | -   | -           | ○   | -           | -   | -   | -   | ○   | -                       | 0.03                                        | <b>0.50<sup>†</sup></b> | <b>0.25<sup>+</sup></b> | 0.13                    | 0.04                    | 0.03                    | -                                            | -    | 0.01 | <b>0.49<sup>†</sup></b> | -                       | <b>0.36<sup>+</sup></b> | 0.02                    | 0.02                    | 0.04                    | 0.01                    | 0.03                    |                         |
| 'Yaebeni-higan'/八重紅彼岸 (Cer138b)                  | -                                         | ○   | -   | -   | ○           | -   | -           | -   | -   | -   | -   | -                       | 0.03                                        | <b>0.54<sup>†</sup></b> | <b>0.26<sup>+</sup></b> | 0.11                    | 0.03                    | 0.04                    | -                                            | -    | 0.01 | <b>0.52<sup>†</sup></b> | -                       | <b>0.31<sup>+</sup></b> | 0.06                    | 0.02                    | 0.03                    | -                       | 0.03                    |                         |
| 'Autumnalis'/十月桜 (Cer138c-i)                     | -                                         | ○   | -   | -   | ○           | -   | -           | -   | -   | -   | -   | -                       | 0.03                                        | <b>0.51<sup>†</sup></b> | <b>0.35<sup>+</sup></b> | 0.06                    | 0.02                    | 0.04                    | -                                            | -    | 0.01 | <b>0.50<sup>†</sup></b> | 0.01                    | <b>0.31<sup>+</sup></b> | 0.10                    | 0.01                    | 0.02                    | -                       | 0.03                    |                         |
| 'Higan-dai-zakura'/彼岸台桜 (Cer138c-i)              | -                                         | -   | ○   | -   | ○           | -   | -           | -   | -   | -   | -   | -                       | 0.03                                        | <b>0.51<sup>†</sup></b> | <b>0.35<sup>+</sup></b> | 0.06                    | 0.02                    | 0.03                    | -                                            | -    | 0.01 | <b>0.50<sup>†</sup></b> | 0.01                    | <b>0.31<sup>+</sup></b> | 0.09                    | 0.01                    | 0.02                    | -                       | 0.03                    |                         |
| 'Subhirtella'/小彼岸 (Cer138c-i)                    | -                                         | -   | ○   | -   | ○           | -   | -           | -   | -   | -   | -   | -                       | 0.03                                        | <b>0.51<sup>†</sup></b> | <b>0.35<sup>+</sup></b> | 0.06                    | 0.02                    | 0.03                    | -                                            | -    | 0.01 | <b>0.50<sup>†</sup></b> | 0.01                    | <b>0.31<sup>+</sup></b> | 0.10                    | 0.01                    | 0.02                    | -                       | 0.03                    |                         |
| 'Higan-dai-zakura'/彼岸台桜 (Cer138c-ii)             | -                                         | -   | ○   | -   | ○           | -   | -           | -   | -   | -   | -   | -                       | 0.03                                        | <b>0.51<sup>†</sup></b> | <b>0.34<sup>+</sup></b> | 0.06                    | 0.02                    | 0.04                    | -                                            | -    | 0.01 | <b>0.50<sup>†</sup></b> | 0.04                    | <b>0.33<sup>+</sup></b> | 0.05                    | 0.01                    | 0.02                    | -                       | 0.03                    |                         |
| 'Subhirtella'/小彼岸 (Cer138d)                      | -                                         | -   | ○   | -   | ○           | -   | -           | -   | -   | -   | -   | -                       | 0.03                                        | <b>0.48<sup>†</sup></b> | <b>0.32<sup>+</sup></b> | 0.12                    | 0.02                    | 0.03                    | -                                            | -    | 0.02 | <b>0.46<sup>†</sup></b> | 0.01                    | <b>0.35<sup>+</sup></b> | 0.07                    | 0.02                    | 0.03                    | 0.01                    | 0.03                    |                         |
| 'Subhirtella'/小彼岸 (Cer138e)                      | -                                         | -   | ○   | -   | ○           | -   | -           | -   | -   | -   | -   | -                       | 0.02                                        | <b>0.57<sup>†</sup></b> | <b>0.24<sup>+</sup></b> | 0.11                    | 0.03                    | 0.02                    | -                                            | -    | -    | <b>0.54<sup>†</sup></b> | -                       | <b>0.33<sup>+</sup></b> | 0.03                    | 0.01                    | 0.02                    | 0.01                    | 0.02                    |                         |
| 'Subhirtella'/小彼岸 (Cer139)                       | -                                         | -   | ○   | -   | ○           | -   | -           | -   | -   | -   | -   | -                       | 0.02                                        | <b>0.50<sup>†</sup></b> | 0.09                    | 0.11                    | <b>0.23<sup>+</sup></b> | 0.05                    | -                                            | 0.01 | -    | <b>0.49<sup>†</sup></b> | 0.02                    | 0.12                    | 0.02                    | 0.07                    | -                       | <b>0.21<sup>+</sup></b> | 0.04                    |                         |
| 'Semperflorens'/四季桜 (Cer140)                     | -                                         | -   | ○   | -   | ○           | -   | -           | -   | -   | -   | -   | -                       | -                                           | <b>0.53<sup>†</sup></b> | 0.03                    | <b>0.31<sup>+</sup></b> | 0.07                    | <b>0.06<sup>+</sup></b> | -                                            | -    | -    | <b>0.53<sup>†</sup></b> | -                       | 0.23                    | -                       | 0.11                    | 0.02                    | 0.02                    | 0.06                    |                         |
| 'Semperflorens'/四季桜 (Cer141)                     | -                                         | -   | ○   | -   | ○           | -   | -           | -   | -   | -   | -   | 0.04                    | 0.01                                        | <b>0.50<sup>†</sup></b> | <b>0.29<sup>+</sup></b> | 0.05                    | 0.06                    | 0.05                    | 0.03                                         | 0.01 | -    | <b>0.47<sup>†</sup></b> | 0.01                    | <b>0.37<sup>+</sup></b> | 0.01                    | 0.01                    | -                       | 0.02                    | 0.04                    |                         |
| 'Hisauchiana'/ヤブザクラ (Cer142)                     | -                                         | -   | ○   | -   | ○           | -   | -           | -   | -   | -   | -   | -                       | 0.03                                        | <b>0.35<sup>+</sup></b> | <b>0.16<sup>+</sup></b> | <b>0.35<sup>+</sup></b> | 0.06                    | 0.05                    | -                                            | 0.04 | -    | <b>0.35<sup>+</sup></b> | 0.01                    | 0.17                    | 0.06                    | <b>0.17<sup>+</sup></b> | 0.11                    | 0.05                    | 0.04                    |                         |
| 'Hisauchiana'/ヤブザクラ (Cer143)                     | -                                         | -   | ○   | -   | ○           | -   | -           | -   | -   | -   | -   | 0.01                    | -                                           | <b>0.31<sup>+</sup></b> | 0.10                    | <b>0.29<sup>+</sup></b> | <b>0.24<sup>+</sup></b> | 0.05                    | -                                            | -    | -    | <b>0.31<sup>+</sup></b> | -                       | <b>0.27<sup>+</sup></b> | -                       | 0.18                    | 0.01                    | <b>0.17<sup>+</sup></b> | 0.04                    |                         |
| 'Omoigawa'/思川 (Cer144)                           | -                                         | -   | ○   | -   | ○           | -   | -           | -   | -   | -   | -   | -                       | 0.01                                        | <b>0.43<sup>†</sup></b> | <b>0.22<sup>+</sup></b> | 0.03                    | <b>0.12<sup>+</sup></b> | <b>0.18<sup>+</sup></b> | -                                            | -    | -    | 0.02                    | <b>0.42<sup>†</sup></b> | -                       | <b>0.25<sup>+</sup></b> | 0.01                    | 0.01                    | -                       | 0.10                    | <b>0.16<sup>+</sup></b> |
| <b><i>Prunus pendula</i></b>                     |                                           |     |     |     |             |     |             |     |     |     |     |                         |                                             |                         |                         |                         |                         |                         |                                              |      |      |                         |                         |                         |                         |                         |                         |                         |                         |                         |
| 'Pendula'/枝垂桜 (Cer145)                           | -                                         | -   | ○   | -   | -           | -   | -           | -   | -   | -   | -   | -                       | 0.02                                        | <b>0.96<sup>‡</sup></b> | -                       | -                       | -                       | -                       | -                                            | -    | 0.02 | <b>0.95<sup>‡</sup></b> | -                       | -                       | -                       | -                       | -                       | -                       | -                       |                         |
| 'Pendula'/枝垂桜 (Cer146)                           | -                                         | -   | ○   | -   | -           | -   | -           | -   | -   | -   | -   | -                       | -                                           | <b>0.97<sup>‡</sup></b> | -                       | -                       | -                       | -                       | -                                            | -    | -    | <b>0.96<sup>‡</sup></b> | -                       | -                       | -                       | -                       | -                       | -                       | -                       |                         |
| 'Pendula'/枝垂桜 (Cer147)                           | -                                         | -   | ○   | -   | -           | -   | -           | -   | -   | -   | -   | -                       | -                                           | <b>0.97<sup>‡</sup></b> | -                       | -                       | -                       | -                       | -                                            | -    | -    | <b>0.97<sup>‡</sup></b> | -                       | -                       | -                       | -                       | -                       | -                       | -                       |                         |
| 'Pendula'/枝垂桜 (Cer148)                           | -                                         | -   | ○   | -   | -           | -   | -           | -   | -   | -   | -   | -                       | -                                           | <b>0.96<sup>‡</sup></b> | -                       | -                       | -                       | -                       | -                                            | -    | -    | <b>0.95<sup>‡</sup></b> | -                       | 0.01                    | -                       | -                       | -                       | -                       | -                       |                         |
| 'Pendula'/枝垂桜 (Cer149)                           | -                                         | -   | ○   | -   | -           | -   | -           | -   | -   | -   | -   | -                       | -                                           | <b>0.96<sup>‡</sup></b> | -                       | -                       | -                       | -                       | -                                            | -    | -    | <b>0.95<sup>‡</sup></b> | -                       | -                       | -                       | -                       | -                       | -                       | -                       |                         |
| 'Pendula'/枝垂桜 (Cer150)                           | -                                         | -   | ○   | -   | -           | -   | -           | -   | -   | -   | -   | -                       | -                                           | <b>0.97<sup>‡</sup></b> | -                       | -                       | -                       | -                       | -                                            | -    | -    | <b>0.96<sup>‡</sup></b> | -                       | -                       | -                       | -                       | -                       | -                       | -                       |                         |
| 'Pendula'/枝垂桜 (Cer151)                           | -                                         | -   | ○   | -   | -           | -   | -           | -   | -   | -   | -   | -                       | -                                           | <b>0.93<sup>‡</sup></b> | 0.02                    | 0.01                    | 0.03                    | -                       | -                                            | -    | -    | <b>0.92<sup>‡</sup></b> | -                       | 0.02                    | -                       | 0.01                    | -                       | 0.02                    | -                       |                         |
| 'Pendula'/枝垂桜 (Cer152)                           | -                                         | -   | ○   | -   | -           | -   | -           | -   | -   | -   | -   | -                       | -                                           | <b>0.92<sup>‡</sup></b> | 0.01                    | 0.05                    | 0.01                    | -                       | -                                            | -    | -    | <b>0.90<sup>‡</sup></b> | -                       | 0.02                    | -                       | 0.04                    | -                       | -                       | -                       |                         |
| 'Pendula'/枝垂桜 (Cer153)                           | -                                         | -   | ○   | -   | -           | -   | -           | -   | -   | -   | -   | -                       | -                                           | <b>0.94<sup>‡</sup></b> | -                       | 0.02                    | 0.01                    | -                       | -                                            | -    | -    | <b>0.93<sup>‡</sup></b> | -                       | 0.01                    | -                       | 0.02                    | -                       | -                       | -                       |                         |
| 'Pendula'/枝垂桜 (Cer154)                           | -                                         | -   | ○   | -   | -           | -   | -           | -   | -   | -   | -   | <b>0.05<sup>+</sup></b> | 0.03                                        | <b>0.89<sup>‡</sup></b> | -                       | 0.01                    | -                       | -                       | <b>0.05<sup>+</sup></b>                      | -    | 0.03 | <b>0.88<sup>‡</sup></b> | -                       | -                       | -                       | 0.01                    | -                       | -                       | -                       |                         |
| 'Pendula'/枝垂桜 (Cer155)                           | -                                         | -   | ○   | -   | -           | -   | -           | -   | -   | -   | -   | -                       | -                                           | <b>0.95<sup>‡</sup></b> | -                       | 0.02                    | -                       | -                       | -                                            | -    | -    | <b>0.94<sup>‡</sup></b> | -                       | 0.01                    | -                       | 0.02                    | -                       | -                       | -                       |                         |
| 'Pendula'/枝垂桜 (Cer156)                           | -                                         | -   | ○   | -   | -           | -   | -           | -   | -   | -   | -   | -                       | -                                           | <b>0.96<sup>‡</sup></b> | -                       | 0.02                    | -                       | -                       | -                                            | -    | -    | <b>0.94<sup>‡</sup></b> | -                       | -                       | -                       | 0.03                    | -                       | -                       | -                       |                         |
| 'Pendula'/枝垂桜 (Cer157)                           | -                                         | -   | ○   | -   | -           | -   | -           | -   | -   | -   | -   | 0.01                    | -                                           | <b>0.95<sup>‡</sup></b> | 0.01                    | -                       | -                       | -                       | -                                            | -    | -    | <b>0.94<sup>‡</sup></b> | -                       | 0.01                    | -                       | -                       | -                       | -                       | -                       |                         |
| 'Pendula'/枝垂桜 (Cer158)                           | -                                         | -   | ○   | -   | -           | -   | -           | -   | -   | -   | -   | 0.02                    | -                                           | <b>0.93<sup>‡</sup></b> | 0.01                    | 0.01                    | -                       | 0.01                    | 0.01                                         | 0.01 | -    | <b>0.92<sup>‡</sup></b> | -                       | 0.01                    | -                       | -                       | -                       | -                       | 0.01                    |                         |

Online Resource 5. (continued)

| Scientific name/Japanese name<br>(New clone no.) | Morphological classification <sup>a</sup> |     |     |     |             |     |             |     |     |     |     |             | STRUCTURE analysis ( $K = 7$ ) <sup>b</sup> |                         |                         |                         |                         |                         | STRUCTURE analysis ( $K = 11$ ) <sup>b</sup> |      |      |                         |                         |                         |                     |      |                         |                         |                         |             |  |
|--------------------------------------------------|-------------------------------------------|-----|-----|-----|-------------|-----|-------------|-----|-----|-----|-----|-------------|---------------------------------------------|-------------------------|-------------------------|-------------------------|-------------------------|-------------------------|----------------------------------------------|------|------|-------------------------|-------------------------|-------------------------|---------------------|------|-------------------------|-------------------------|-------------------------|-------------|--|
|                                                  | cam                                       | pse | pen | ape | ape.<br>pil | inc | inc.<br>kin | nip | sar | ver | jam | lan.<br>spe | max                                         | cam/<br>pse             | pen                     | ape/<br>inc/<br>nip     | sar/<br>ver             | jam                     | lan.<br>spe                                  | max  | cam  | pse                     | pen                     | ape                     | ape.<br>pil/<br>inc | nip  | sar                     | ver                     | jam                     | lan.<br>spe |  |
| 'Pendula'/枝垂桜 (Cer159)                           | -                                         | -   | ○   | -   | -           | -   | -           | -   | -   | -   | -   | 0.03        | -                                           | <b>0.88<sup>‡</sup></b> | 0.04                    | 0.03                    | 0.01                    | -                       | 0.03                                         | -    | -    | <b>0.87<sup>‡</sup></b> | -                       | 0.02                    | 0.03                | 0.02 | -                       | -                       | -                       |             |  |
| 'Pendula'/枝垂桜 (Cer160)                           | -                                         | -   | ○   | -   | -           | -   | -           | -   | -   | -   | -   | -           | 0.03                                        | <b>0.78<sup>‡</sup></b> | <b>0.14<sup>+</sup></b> | 0.02                    | 0.01                    | 0.01                    | -                                            | -    | 0.03 | <b>0.77<sup>‡</sup></b> | -                       | <b>0.12<sup>+</sup></b> | 0.04                | -    | 0.01                    | -                       | -                       |             |  |
| 'Pendula'/枝垂桜 (Cer161)                           | -                                         | -   | ○   | -   | -           | -   | -           | -   | -   | -   | -   | -           | -                                           | <b>0.95<sup>‡</sup></b> | 0.01                    | 0.02                    | -                       | -                       | -                                            | -    | -    | <b>0.94<sup>‡</sup></b> | -                       | 0.01                    | -                   | -    | 0.01                    | -                       | -                       |             |  |
| 'Pendula'/枝垂桜 (Cer162)                           | -                                         | -   | ○   | -   | -           | -   | -           | -   | -   | -   | -   | -           | -                                           | <b>0.97<sup>‡</sup></b> | -                       | -                       | -                       | -                       | -                                            | -    | -    | <b>0.96<sup>‡</sup></b> | -                       | -                       | -                   | -    | -                       | -                       | -                       |             |  |
| 'Pendula'/枝垂桜 (Cer163)                           | -                                         | -   | ○   | -   | -           | -   | -           | -   | -   | -   | -   | -           | -                                           | <b>0.97<sup>‡</sup></b> | -                       | 0.01                    | -                       | -                       | -                                            | -    | -    | <b>0.95<sup>‡</sup></b> | -                       | 0.01                    | -                   | 0.02 | -                       | -                       | -                       |             |  |
| 'Plena-rosea'/八重紅枝垂 (Cer164)                     | -                                         | -   | ○   | -   | -           | -   | -           | -   | -   | -   | -   | -           | 0.03                                        | <b>0.86<sup>‡</sup></b> | <b>0.07<sup>+</sup></b> | 0.01                    | -                       | 0.01                    | -                                            | -    | 0.03 | <b>0.85<sup>‡</sup></b> | -                       | 0.05                    | 0.03                | -    | -                       | -                       | -                       |             |  |
| 'Ujou-shidare'/雨情枝垂 (Cer165)                     | -                                         | -   | ○   | -   | -           | -   | -           | -   | -   | -   | -   | -           | 0.02                                        | <b>0.65<sup>‡</sup></b> | <b>0.20<sup>+</sup></b> | 0.03                    | 0.09                    | 0.01                    | -                                            | -    | 0.02 | <b>0.65<sup>‡</sup></b> | -                       | <b>0.23<sup>+</sup></b> | 0.01                | -    | -                       | 0.05                    | -                       |             |  |
| <b>Prunus ×sacra</b>                             |                                           |     |     |     |             |     |             |     |     |     |     |             |                                             |                         |                         |                         |                         |                         |                                              |      |      |                         |                         |                         |                     |      |                         |                         |                         |             |  |
| 'Mochidzukiana'/モチヅキザクラ (Cer166)                 | -                                         | -   | ○   | -   | -           | -   | -           | -   | -   | -   | ○   | -           | 0.02                                        | -                       | <b>0.44<sup>†</sup></b> | <b>0.28<sup>+</sup></b> | 0.04                    | <b>0.21<sup>+</sup></b> | -                                            | 0.02 | -    | -                       | <b>0.43<sup>†</sup></b> | 0.04                    | 0.11                | 0.10 | 0.01                    | 0.03                    | <b>0.24<sup>+</sup></b> | -           |  |
| 'Sacra'/勝手桜 (Cer167)                             | -                                         | -   | ○   | -   | -           | -   | -           | -   | -   | -   | ○   | -           | 0.02                                        | -                       | <b>0.51<sup>†</sup></b> | 0.02                    | 0.02                    | <b>0.41<sup>†</sup></b> | -                                            | 0.03 | -    | -                       | <b>0.51<sup>†</sup></b> | -                       | 0.02                | -    | 0.03                    | -                       | <b>0.39<sup>+</sup></b> | -           |  |
| <b>Prunus ×yedoensis</b>                         |                                           |     |     |     |             |     |             |     |     |     |     |             |                                             |                         |                         |                         |                         |                         |                                              |      |      |                         |                         |                         |                     |      |                         |                         |                         |             |  |
| 'Amagi-yoshino'/天城吉野 (Cer168)                    | -                                         | -   | ○   | -   | -           | -   | -           | -   | -   | -   | ○   | -           | -                                           | <b>0.42<sup>†</sup></b> | 0.02                    | 0.01                    | 0.02                    | <b>0.52<sup>†</sup></b> | -                                            | 0.01 | -    | <b>0.40<sup>†</sup></b> | -                       | 0.03                    | 0.03                | 0.03 | -                       | 0.01                    | <b>0.47<sup>†</sup></b> |             |  |
| 'America'/アメリカ (Cer169)                          | -                                         | -   | ○   | -   | -           | -   | -           | -   | -   | -   | ○   | 0.05        | 0.03                                        | <b>0.50<sup>†</sup></b> | 0.02                    | 0.06                    | <b>0.25<sup>+</sup></b> | 0.09                    | 0.06                                         | -    | 0.04 | <b>0.49<sup>†</sup></b> | -                       | 0.04                    | 0.02                | 0.03 | 0.04                    | <b>0.23<sup>+</sup></b> | 0.05                    |             |  |
| 'Candida'/薄毛大島 (Cer170)                          | -                                         | -   | ○   | -   | -           | -   | -           | -   | -   | -   | ○   | -           | -                                           | <b>0.12<sup>+</sup></b> | -                       | 0.02                    | 0.08                    | <b>0.75<sup>‡</sup></b> | -                                            | -    | -    | <b>0.12<sup>+</sup></b> | -                       | 0.01                    | -                   | 0.02 | -                       | 0.07                    | <b>0.75<sup>‡</sup></b> |             |  |
| 'Funabara-yoshino'/船原吉野 (Cer171)                 | -                                         | -   | ○   | -   | -           | -   | -           | -   | -   | -   | ○   | -           | -                                           | <b>0.41<sup>†</sup></b> | 0.01                    | 0.02                    | 0.07                    | <b>0.48<sup>†</sup></b> | -                                            | -    | -    | <b>0.41<sup>†</sup></b> | -                       | 0.02                    | -                   | 0.02 | -                       | 0.06                    | <b>0.47<sup>†</sup></b> |             |  |
| 'Hayazaki-oshima'/早咲大島 (Cer172)                  | -                                         | -   | ○   | -   | -           | -   | -           | -   | -   | -   | ○   | -           | -                                           | -                       | 0.02                    | 0.01                    | -                       | <b>0.94<sup>‡</sup></b> | -                                            | -    | -    | -                       | -                       | 0.02                    | 0.01                | 0.01 | -                       | -                       | <b>0.93<sup>‡</sup></b> |             |  |
| 'Izu-yoshino'/伊豆吉野 (Cer173)                      | -                                         | -   | ○   | -   | -           | -   | -           | -   | -   | -   | ○   | -           | -                                           | <b>0.21<sup>+</sup></b> | 0.01                    | 0.06                    | 0.03                    | <b>0.67<sup>‡</sup></b> | -                                            | -    | -    | <b>0.20<sup>+</sup></b> | -                       | -                       | 0.02                | 0.07 | -                       | 0.02                    | <b>0.65<sup>‡</sup></b> |             |  |
| 'Kichijouji'/吉祥寺 (Cer174)                        | -                                         | -   | ○   | -   | -           | -   | -           | -   | -   | -   | ○   | -           | -                                           | <b>0.24<sup>+</sup></b> | 0.03                    | 0.02                    | 0.06                    | <b>0.64<sup>†</sup></b> | -                                            | -    | -    | <b>0.24<sup>+</sup></b> | -                       | 0.05                    | -                   | 0.01 | -                       | 0.04                    | <b>0.63<sup>†</sup></b> |             |  |
| 'Kurama-zakura'/鞍馬桜 (Cer175)                     | -                                         | -   | ○   | -   | -           | -   | -           | -   | -   | -   | ○   | 0.04        | -                                           | <b>0.47<sup>†</sup></b> | 0.01                    | 0.04                    | <b>0.24<sup>+</sup></b> | <b>0.19<sup>+</sup></b> | 0.04                                         | -    | -    | <b>0.47<sup>†</sup></b> | -                       | -                       | -                   | 0.04 | -                       | <b>0.23<sup>+</sup></b> | <b>0.19<sup>+</sup></b> |             |  |
| 'Mikado-yoshino'/御帝吉野 (Cer176)                   | -                                         | -   | ○   | -   | -           | -   | -           | -   | -   | -   | ○   | -           | 0.01                                        | <b>0.45<sup>†</sup></b> | 0.04                    | 0.03                    | 0.02                    | <b>0.44<sup>†</sup></b> | -                                            | 0.01 | -    | <b>0.43<sup>†</sup></b> | -                       | 0.04                    | 0.05                | 0.03 | -                       | 0.01                    | <b>0.41<sup>†</sup></b> |             |  |
| 'Mishima-zakura'/三島桜 (Cer177)                    | -                                         | -   | ○   | -   | -           | -   | -           | -   | -   | -   | ○   | -           | -                                           | <b>0.18<sup>+</sup></b> | -                       | 0.02                    | 0.10                    | <b>0.68<sup>‡</sup></b> | -                                            | -    | -    | <b>0.18<sup>+</sup></b> | -                       | -                       | -                   | 0.02 | -                       | 0.09                    | <b>0.68<sup>‡</sup></b> |             |  |
| 'Morioka-pendula'/盛岡枝垂 (Cer178)                  | -                                         | -   | ○   | -   | -           | -   | -           | -   | -   | -   | ○   | -           | 0.03                                        | <b>0.47<sup>†</sup></b> | 0.03                    | 0.04                    | <b>0.19<sup>+</sup></b> | <b>0.24<sup>+</sup></b> | -                                            | -    | 0.03 | <b>0.46<sup>†</sup></b> | -                       | 0.04                    | 0.02                | -    | 0.02                    | <b>0.17<sup>+</sup></b> | <b>0.23<sup>+</sup></b> |             |  |
| 'Naniwa-zakura'/浪速桜 (Cer179)                     | -                                         | -   | ○   | -   | -           | -   | -           | -   | -   | -   | ○   | -           | -                                           | <b>0.13<sup>+</sup></b> | 0.02                    | 0.12                    | 0.10                    | <b>0.62<sup>†</sup></b> | -                                            | -    | -    | <b>0.13<sup>+</sup></b> | -                       | 0.02                    | 0.02                | 0.01 | 0.07                    | 0.12                    | <b>0.62<sup>†</sup></b> |             |  |
| 'Pendula'/枝垂大島桜 (Cer180)                         | -                                         | -   | ○   | -   | -           | -   | -           | -   | -   | -   | ○   | 0.02        | -                                           | <b>0.54<sup>†</sup></b> | 0.02                    | 0.06                    | <b>0.31<sup>+</sup></b> | 0.05                    | -                                            | -    | -    | <b>0.52<sup>†</sup></b> | -                       | 0.01                    | 0.01                | -    | <b>0.09<sup>+</sup></b> | <b>0.30<sup>+</sup></b> | 0.04                    |             |  |
| 'Perpendens'/枝垂染井吉野 (Cer181)                     | -                                         | -   | ○   | -   | -           | -   | -           | -   | -   | -   | ○   | -           | 0.01                                        | <b>0.47<sup>†</sup></b> | 0.04                    | -                       | <b>0.21<sup>+</sup></b> | <b>0.26<sup>+</sup></b> | -                                            | -    | -    | <b>0.46<sup>†</sup></b> | 0.02                    | 0.01                    | 0.01                | -    | -                       | <b>0.20<sup>+</sup></b> | <b>0.26<sup>+</sup></b> |             |  |
| 'Pilosa'/毛大島桜 (Cer182)                           | -                                         | -   | ○   | -   | -           | -   | -           | -   | -   | -   | ○   | -           | -                                           | <b>0.22<sup>+</sup></b> | 0.01                    | 0.02                    | 0.08                    | <b>0.66<sup>‡</sup></b> | -                                            | -    | -    | <b>0.22<sup>+</sup></b> | -                       | 0.02                    | 0.02                | -    | -                       | 0.06                    | <b>0.65<sup>‡</sup></b> |             |  |
| 'Pilosa'/毛大島桜 (Cer183)                           | -                                         | -   | ○   | -   | -           | -   | -           | -   | -   | -   | ○   | 0.01        | -                                           | <b>0.13<sup>+</sup></b> | 0.03                    | 0.02                    | <b>0.34<sup>+</sup></b> | <b>0.46<sup>†</sup></b> | -                                            | -    | -    | <b>0.13<sup>+</sup></b> | -                       | 0.04                    | 0.02                | -    | -                       | <b>0.32<sup>+</sup></b> | <b>0.46<sup>†</sup></b> |             |  |
| 'Sakabai'/仙台吉野 (Cer184)                          | -                                         | -   | ○   | -   | -           | -   | -           | -   | -   | -   | ○   | -           | -                                           | <b>0.53<sup>†</sup></b> | 0.07                    | 0.03                    | 0.08                    | <b>0.27<sup>+</sup></b> | -                                            | -    | -    | <b>0.53<sup>†</sup></b> | 0.01                    | 0.03                    | 0.06                | 0.03 | -                       | 0.05                    | <b>0.26<sup>+</sup></b> |             |  |
| 'Sakuyahime'/咲耶姫 (Cer185)                        | -                                         | -   | ○   | -   | -           | -   | -           | -   | -   | -   | ○   | -           | -                                           | <b>0.18<sup>+</sup></b> | -                       | 0.01                    | 0.07                    | <b>0.71<sup>‡</sup></b> | -                                            | 0.01 | -    | <b>0.18<sup>+</sup></b> | -                       | 0.02                    | -                   | 0.01 | -                       | 0.05                    | <b>0.69<sup>‡</sup></b> |             |  |
| 'Sasabe-zakura'/笹部桜 (Cer186)                     | -                                         | -   | ○   | -   | -           | -   | -           | -   | -   | -   | ○   | 0.01        | 0.02                                        | <b>0.11<sup>+</sup></b> | 0.06                    | 0.08                    | <b>0.27<sup>+</sup></b> | <b>0.44<sup>†</sup></b> | -                                            | -    | 0.03 | <b>0.10<sup>+</sup></b> | -                       | 0.06                    | 0.04                | 0.01 | 0.03                    | <b>0.26<sup>+</sup></b> | <b>0.43<sup>†</sup></b> |             |  |
| 'Shouwa-zakura'/昭和桜 (Cer187)                     | -                                         | -   | ○   | -   | -           | -   | -           | -   | -   | -   | ○   | -           | -                                           | <b>0.37<sup>+</sup></b> | -                       | 0.02                    | 0.01                    | <b>0.57<sup>†</sup></b> | -                                            | -    | -    | <b>0.37<sup>+</sup></b> | -                       | -                       | -                   | 0.02 | -                       | -                       | <b>0.57<sup>†</sup></b> |             |  |
| 'Somei-higan'/染井彼岸 (Cer188)                      | -                                         | -   | ○   | -   | -           | -   | -           | -   | -   | -   | ○   | 0.01        | -                                           | <b>0.25<sup>+</sup></b> | 0.12                    | 0.10                    | 0.12                    | <b>0.38<sup>+</sup></b> | -                                            | -    | -    | <b>0.25<sup>+</sup></b> | -                       | <b>0.22<sup>+</sup></b> | 0.02                | 0.01 | 0.06                    | 0.05                    | <b>0.37<sup>+</sup></b> |             |  |
| 'Somei-nioi'/染井匂 (Cer189)                        | -                                         | -   | ○   | -   | -           | -   | -           | -   | -   | -   | ○   | -           | -                                           | <b>0.19<sup>+</sup></b> | -                       | 0.02                    | 0.07                    | <b>0.71<sup>‡</sup></b> | -                                            | -    | -    | <b>0.18<sup>+</sup></b> | -                       | -                       | -                   | -    | -                       | 0.07                    | <b>0.70<sup>‡</sup></b> |             |  |
| 'Sotorihime'/衣通姫 (Cer190)                        | -                                         | -   | ○   | -   | -           | -   | -           | -   | -   | -   | ○   | -           | -                                           | <b>0.11<sup>+</sup></b> | 0.01                    | 0.01                    | 0.10                    | <b>0.75<sup>‡</sup></b> | -                                            | 0.02 | -    | <b>0.11<sup>+</sup></b> | -                       | 0.02                    | 0.01                | 0.02 | -                       | 0.08                    | <b>0.71<sup>‡</sup></b> |             |  |
| 'Suruga-zakura'/駿河桜 (Cer191)                     | -                                         | -   | ○   | -   | -           | -   | -           | -   | -   | -   | ○   | -           | -                                           | <b>0.15<sup>+</sup></b> | -                       | 0.03                    | 0.04                    | <b>0.76<sup>‡</sup></b> | -                                            | -    | -    | <b>0.13<sup>+</sup></b> | -                       | 0.01                    | 0.01                | 0.05 | -                       | 0.04                    | <b>0.74<sup>‡</sup></b> |             |  |
| 'Syuzenzi-zakura'/修善寺桜 (Cer192)                  | -                                         | -   | ○   | -   | -           | -   | -           | -   | -   | -   | ○   | -           | -                                           | <b>0.25<sup>+</sup></b> | 0.03                    | 0.04                    | <b>0.19<sup>+</sup></b> | <b>0.49<sup>†</sup></b> | -                                            | -    | -    | <b>0.24<sup>+</sup></b> | 0.01                    | 0.04                    | -                   | 0.01 | 0.02                    | 0.17                    | <b>0.48<sup>†</sup></b> |             |  |
| 'Waseyoshino'/早生吉野 (Cer193)                      | -                                         | -   | ○   | -   | -           | -   | -           | -   | -   | -   | ○   | -           | -                                           | <b>0.34<sup>+</sup></b> | -                       | -                       | -                       | <b>0.62<sup>†</sup></b> | -                                            | -    | -    | <b>0.34<sup>+</sup></b> | -                       | -                       | -                   | 0.02 | -                       | -                       | <b>0.60<sup>†</sup></b> |             |  |
| 'Somei-beni'/染井紅 (Cer194)                        | -                                         | -   | ○   | -   | -           | -   | -           | -   | -   | -   | ○   | -           | -                                           | <b>0.47<sup>†</sup></b> | -                       | 0.01                    | 0.12                    | <b>0.38<sup>+</sup></b> | -                                            | -    | -    | <b>0.47<sup>†</sup></b> | -                       | 0.01                    | -                   | 0.01 | -                       | 0.11                    | <b>0.37<sup>+</sup></b> |             |  |
| 'Yedoensis'/染井吉野 (Cer194)                        | -                                         | -   | ○   | -   | -           | -   | -           | -   | -   | -   | ○   | -           | -                                           | <b>0.47<sup>†</sup></b> | -                       | 0.01                    | 0.12                    | <b>0.38<sup>+</sup></b> | -                                            | -    | -    | <b>0.47<sup>†</sup></b> | -                       | 0.01                    | -                   | 0.01 | -                       | 0.11                    | <b>0.37<sup>+</sup></b> |             |  |

Online Resource 5. (continued)

| Scientific name/Japanese name<br>(New clone no.) | Morphological classification <sup>a</sup> |     |     |     |         |     |         |     |     |     |     | STRUCTURE analysis ( $K = 7$ ) <sup>b</sup> |                          |                          |                          |                          | STRUCTURE analysis ( $K = 11$ ) <sup>b</sup> |                          |         |                          |                          |                          |                          |                          |                          |      |                          |                          |                          |         |  |
|--------------------------------------------------|-------------------------------------------|-----|-----|-----|---------|-----|---------|-----|-----|-----|-----|---------------------------------------------|--------------------------|--------------------------|--------------------------|--------------------------|----------------------------------------------|--------------------------|---------|--------------------------|--------------------------|--------------------------|--------------------------|--------------------------|--------------------------|------|--------------------------|--------------------------|--------------------------|---------|--|
|                                                  | cam                                       | pse | pen | ape | ape.pil | inc | inc.kin | nip | sar | ver | jam | lan.spe                                     | max                      | cam/pse                  | pen                      | ape/inc/nip              | sar/ver                                      | jam                      | lan.spe | max                      | cam                      | pse                      | pen                      | ape                      | ape.pil/inc              | nip  | sar                      | ver                      | jam                      | lan.spe |  |
| <b>Prunus</b>                                    |                                           |     |     |     |         |     |         |     |     |     |     |                                             |                          |                          |                          |                          |                                              |                          |         |                          |                          |                          |                          |                          |                          |      |                          |                          |                          |         |  |
| 'Kobuku-zakura'/子福桜 (Cer195)                     | -                                         | ○   | ○   | -   | -       | ○   | -       | -   | -   | -   | -   | -                                           | -                        | <b>0.36</b> <sup>+</sup> | -                        | 0.02                     | <b>0.20</b> <sup>+</sup>                     | <b>0.41</b> <sup>†</sup> | -       | -                        | -                        | <b>0.35</b> <sup>+</sup> | -                        | 0.02                     | -                        | 0.02 | -                        | <b>0.18</b> <sup>+</sup> | <b>0.41</b> <sup>†</sup> |         |  |
| 'Kursar'/クルサル (Cer196)                           | ○                                         | -   | -   | -   | -       | -   | ○       | -   | -   | -   | -   | -                                           | <b>0.38</b> <sup>+</sup> | -                        | <b>0.40</b> <sup>+</sup> | <b>0.17</b> <sup>+</sup> | 0.03                                         | -                        | -       | <b>0.40</b> <sup>†</sup> | -                        | 0.01                     | 0.03                     | 0.01                     | <b>0.35</b> <sup>+</sup> | 0.05 | 0.09                     | 0.04                     | -                        |         |  |
| 'Manadzuru-littorea'/水玉桜 (Cer197)                | -                                         | -   | ○   | -   | -       | ○   | -       | -   | -   | -   | ○   | 0.01                                        | -                        | <b>0.31</b> <sup>+</sup> | 0.04                     | <b>0.23</b> <sup>+</sup> | 0.08                                         | <b>0.32</b> <sup>+</sup> | 0.01    | -                        | -                        | <b>0.30</b> <sup>+</sup> | -                        | 0.11                     | 0.02                     | 0.04 | 0.09                     | 0.09                     | <b>0.31</b> <sup>+</sup> |         |  |
| 'Moniwana'/茂庭桜 (Cer198)                          | -                                         | -   | ○   | ○   | -       | -   | -       | -   | -   | -   | ○   | -                                           | -                        | <b>0.12</b> <sup>+</sup> | <b>0.36</b> <sup>+</sup> | 0.13                     | 0.06                                         | <b>0.33</b> <sup>+</sup> | -       | -                        | -                        | <b>0.13</b> <sup>+</sup> | <b>0.23</b> <sup>+</sup> | 0.11                     | 0.03                     | 0.02 | 0.09                     | 0.05                     | <b>0.33</b> <sup>+</sup> |         |  |
| 'Okame'/オカメ (Cer199)                             | ○                                         | -   | -   | -   | -       | ○   | -       | -   | -   | -   | -   | 0.01                                        | <b>0.42</b> <sup>†</sup> | -                        | <b>0.34</b> <sup>+</sup> | 0.07                     | 0.10                                         | 0.06                     | -       | <b>0.46</b> <sup>†</sup> | -                        | -                        | 0.03                     | <b>0.38</b> <sup>+</sup> | 0.01                     | 0.03 | -                        | 0.02                     | 0.06                     |         |  |
| 'Rubriflora'/紅鶴桜 (Cer200)                        | ○                                         | -   | ○   | -   | -       | -   | -       | -   | -   | -   | ○   | 0.01                                        | 0.03                     | <b>0.24</b> <sup>+</sup> | 0.04                     | 0.18                     | 0.13                                         | <b>0.37</b> <sup>+</sup> | 0.01    | 0.01                     | -                        | <b>0.24</b> <sup>+</sup> | -                        | 0.17                     | 0.02                     | 0.05 | 0.03                     | 0.08                     | <b>0.37</b> <sup>+</sup> |         |  |
| 'Takinoensis'/滝野桜 (Cer201)                       | -                                         | -   | ○   | -   | -       | -   | -       | -   | -   | ○   | ○   | -                                           | -                        | <b>0.23</b> <sup>+</sup> | 0.03                     | <b>0.37</b> <sup>+</sup> | 0.04                                         | <b>0.32</b> <sup>+</sup> | -       | -                        | -                        | <b>0.22</b> <sup>+</sup> | 0.03                     | 0.02                     | 0.02                     | 0.01 | <b>0.33</b> <sup>+</sup> | 0.05                     | <b>0.32</b> <sup>+</sup> |         |  |
| 'Youkou'/陽光 (Cer202)                             | ○                                         | -   | ○   | -   | -       | -   | -       | -   | -   | -   | ○   | -                                           | <b>0.36</b> <sup>+</sup> | <b>0.18</b> <sup>+</sup> | 0.01                     | 0.06                     | 0.02                                         | <b>0.37</b> <sup>+</sup> | -       | <b>0.39</b> <sup>+</sup> | -                        | <b>0.17</b> <sup>+</sup> | -                        | 0.01                     | -                        | -    | 0.03                     | 0.02                     | <b>0.35</b> <sup>+</sup> |         |  |
| <b>Prunus campanulata</b>                        |                                           |     |     |     |         |     |         |     |     |     |     |                                             |                          |                          |                          |                          |                                              |                          |         |                          |                          |                          |                          |                          |                          |      |                          |                          |                          |         |  |
| 'Ryukyu-hizakura'/琉球寒緋桜 (Cer203)                 | ○                                         | -   | -   | -   | -       | -   | -       | -   | -   | -   | -   | -                                           | <b>0.96</b> <sup>‡</sup> | -                        | -                        | -                        | 0.01                                         | -                        | -       | <b>0.96</b> <sup>‡</sup> | -                        | -                        | -                        | -                        | -                        | -    | -                        | -                        | -                        |         |  |
| <b>Prunus ×kanzakura</b>                         |                                           |     |     |     |         |     |         |     |     |     |     |                                             |                          |                          |                          |                          |                                              |                          |         |                          |                          |                          |                          |                          |                          |      |                          |                          |                          |         |  |
| 'Kawazu-zakura'/河津桜 (Cer204-i)                   | ○                                         | -   | -   | -   | -       | -   | -       | -   | -   | -   | ○   | -                                           | <b>0.49</b> <sup>†</sup> | -                        | 0.02                     | 0.17                     | -                                            | <b>0.30</b> <sup>+</sup> | -       | <b>0.52</b> <sup>†</sup> | -                        | -                        | -                        | 0.03                     | 0.03                     | 0.06 | 0.05                     | -                        | <b>0.29</b> <sup>+</sup> |         |  |
| 'Kawazu-zakura'/河津桜 (Cer204-ii)                  | ○                                         | -   | -   | -   | -       | -   | -       | -   | -   | -   | ○   | -                                           | <b>0.48</b> <sup>†</sup> | -                        | 0.02                     | 0.17                     | -                                            | <b>0.31</b> <sup>+</sup> | -       | <b>0.52</b> <sup>†</sup> | -                        | -                        | -                        | 0.03                     | 0.03                     | 0.06 | 0.05                     | -                        | <b>0.28</b> <sup>+</sup> |         |  |
| 'Kanzakura'/寒桜 (Cer206)                          | ○                                         | -   | -   | -   | -       | -   | -       | -   | -   | -   | ○   | -                                           | <b>0.48</b> <sup>†</sup> | <b>0.23</b> <sup>+</sup> | -                        | 0.01                     | <b>0.15</b> <sup>+</sup>                     | <b>0.12</b> <sup>+</sup> | -       | <b>0.45</b> <sup>†</sup> | 0.01                     | <b>0.22</b> <sup>+</sup> | -                        | 0.01                     | 0.01                     | 0.01 | -                        | 0.11                     | <b>0.16</b> <sup>+</sup> |         |  |
| 'Kanzakura'/寒桜 (Cer207)                          | ○                                         | -   | -   | -   | -       | -   | -       | -   | -   | -   | ○   | 0.02                                        | <b>0.51</b> <sup>†</sup> | 0.01                     | 0.05                     | 0.02                     | <b>0.38</b> <sup>+</sup>                     | -                        | 0.02    | <b>0.48</b> <sup>†</sup> | 0.01                     | -                        | 0.01                     | 0.02                     | 0.01                     | 0.01 | 0.02                     | <b>0.39</b> <sup>+</sup> | -                        |         |  |
| 'Kanzakura'/寒桜 (Cer208)                          | ○                                         | -   | -   | -   | -       | -   | -       | -   | -   | -   | ○   | 0.02                                        | <b>0.51</b> <sup>†</sup> | -                        | 0.01                     | -                        | <b>0.43</b> <sup>†</sup>                     | -                        | 0.02    | <b>0.50</b> <sup>†</sup> | 0.01                     | -                        | 0.02                     | -                        | -                        | -    | 0.01                     | <b>0.41</b> <sup>†</sup> | -                        |         |  |
| 'Kanzakura'/寒桜 (Cer209)                          | ○                                         | -   | -   | -   | -       | -   | -       | -   | -   | -   | ○   | -                                           | <b>0.44</b> <sup>†</sup> | -                        | 0.09                     | 0.02                     | <b>0.44</b> <sup>†</sup>                     | -                        | -       | <b>0.46</b> <sup>†</sup> | -                        | -                        | 0.03                     | 0.04                     | 0.06                     | -    | 0.02                     | <b>0.39</b> <sup>+</sup> | -                        |         |  |
| 'Oh-kanzakura'/大寒桜 (Cer210)                      | ○                                         | -   | -   | -   | -       | -   | -       | -   | -   | -   | ○   | -                                           | <b>0.57</b> <sup>†</sup> | -                        | 0.03                     | 0.03                     | <b>0.21</b> <sup>+</sup>                     | <b>0.15</b> <sup>+</sup> | -       | <b>0.46</b> <sup>†</sup> | 0.03                     | -                        | 0.07                     | 0.01                     | -                        | 0.03 | <b>0.19</b> <sup>+</sup> | <b>0.18</b> <sup>+</sup> |                          |         |  |
| 'Rubescens'/修善寺寒桜 (Cer211)                       | ○                                         | -   | -   | -   | -       | -   | -       | -   | -   | -   | ○   | -                                           | <b>0.43</b> <sup>†</sup> | -                        | -                        | 0.02                     | 0.01                                         | <b>0.52</b> <sup>†</sup> | -       | <b>0.40</b> <sup>†</sup> | -                        | -                        | -                        | 0.01                     | 0.01                     | 0.02 | 0.01                     | -                        | <b>0.51</b> <sup>†</sup> |         |  |
| 'Yokohama-hizakura'/横浜緋桜 (Cer212)                | ○                                         | -   | -   | -   | -       | -   | -       | -   | -   | -   | ○   | -                                           | <b>0.45</b> <sup>†</sup> | 0.01                     | <b>0.18</b> <sup>+</sup> | 0.04                     | <b>0.16</b> <sup>+</sup>                     | 0.15                     | -       | <b>0.42</b> <sup>†</sup> | 0.03                     | -                        | -                        | 0.02                     | <b>0.15</b> <sup>+</sup> | 0.05 | 0.02                     | <b>0.14</b> <sup>+</sup> | 0.15                     |         |  |
| <b>Prunus ×introrsa</b>                          |                                           |     |     |     |         |     |         |     |     |     |     |                                             |                          |                          |                          |                          |                                              |                          |         |                          |                          |                          |                          |                          |                          |      |                          |                          |                          |         |  |
| 'Hina-zakura'/雛桜 (Cer213)                        | ○                                         | ○   | -   | -   | -       | -   | -       | -   | -   | -   | -   | -                                           | <b>0.94</b> <sup>‡</sup> | -                        | 0.02                     | 0.01                     | 0.03                                         | -                        | -       | <b>0.35</b> <sup>+</sup> | <b>0.58</b> <sup>†</sup> | -                        | -                        | 0.02                     | -                        | -    | 0.01                     | 0.02                     | -                        |         |  |
| 'Introrsa'/椿寒桜 (Cer214)                          | ○                                         | ○   | -   | -   | -       | -   | -       | -   | -   | -   | ○   | -                                           | <b>0.96</b> <sup>‡</sup> | -                        | -                        | -                        | 0.02                                         | -                        | -       | <b>0.33</b> <sup>+</sup> | <b>0.62</b> <sup>†</sup> | -                        | -                        | -                        | -                        | -    | -                        | 0.02                     | -                        |         |  |
| 'Myoshoji'/明正寺 (Cer216)                          | ○                                         | ○   | -   | -   | -       | -   | -       | -   | -   | -   | ○   | -                                           | <b>0.64</b> <sup>‡</sup> | -                        | <b>0.07</b> <sup>+</sup> | 0.01                     | -                                            | <b>0.27</b> <sup>+</sup> | -       | 0.02                     | <b>0.61</b> <sup>†</sup> | -                        | 0.01                     | 0.05                     | -                        | 0.01 | 0.01                     | -                        | <b>0.28</b> <sup>+</sup> |         |  |
| 'Tagabeni'/多賀紅 (Cer218)                          | ○                                         | ○   | -   | -   | -       | -   | -       | -   | -   | -   | ○   | 0.02                                        | <b>0.91</b> <sup>‡</sup> | -                        | 0.05                     | -                        | -                                            | -                        | 0.01    | <b>0.24</b> <sup>+</sup> | <b>0.68</b> <sup>‡</sup> | -                        | 0.03                     | 0.02                     | -                        | -    | -                        | -                        | -                        |         |  |
| 'Yayoi-zakura'/弥生桜 (Cer219)                      | ○                                         | ○   | -   | -   | -       | -   | -       | -   | -   | -   | -   | -                                           | <b>0.95</b> <sup>‡</sup> | -                        | -                        | -                        | 0.03                                         | -                        | -       | <b>0.32</b> <sup>+</sup> | <b>0.63</b> <sup>†</sup> | -                        | -                        | -                        | -                        | -    | -                        | 0.03                     | -                        |         |  |
| <b>Prunus ×miyoshii</b>                          |                                           |     |     |     |         |     |         |     |     |     |     |                                             |                          |                          |                          |                          |                                              |                          |         |                          |                          |                          |                          |                          |                          |      |                          |                          |                          |         |  |
| 'Ambigua'/泰山府君 (Cer220a)                         | -                                         | ○   | -   | -   | -       | -   | -       | -   | -   | -   | ○   | -                                           | <b>0.12</b> <sup>+</sup> | 0.01                     | <b>0.18</b> <sup>+</sup> | 0.08                     | 0.07                                         | <b>0.54</b> <sup>†</sup> | -       | -                        | <b>0.12</b> <sup>+</sup> | -                        | 0.01                     | <b>0.24</b> <sup>+</sup> | 0.03                     | 0.03 | 0.02                     | 0.03                     | <b>0.51</b> <sup>†</sup> |         |  |
| 'Ambigua'/泰山府君 (Cer220b)                         | -                                         | ○   | -   | -   | -       | -   | -       | -   | -   | -   | ○   | -                                           | <b>0.10</b> <sup>+</sup> | 0.02                     | <b>0.18</b> <sup>+</sup> | 0.08                     | 0.06                                         | <b>0.56</b> <sup>†</sup> | -       | -                        | <b>0.10</b> <sup>+</sup> | -                        | -                        | <b>0.26</b> <sup>+</sup> | 0.03                     | 0.02 | 0.01                     | 0.02                     | <b>0.53</b> <sup>†</sup> |         |  |
| <b>Prunus ×takenakae</b>                         |                                           |     |     |     |         |     |         |     |     |     |     |                                             |                          |                          |                          |                          |                                              |                          |         |                          |                          |                          |                          |                          |                          |      |                          |                          |                          |         |  |
| 'Takenakae'/東海桜 (Cer221-i)                       | ○                                         | ○   | -   | ○   | -       | ○   | -       | -   | -   | -   | -   | -                                           | <b>0.58</b> <sup>†</sup> | 0.05                     | <b>0.26</b> <sup>+</sup> | 0.03                     | <b>0.09</b> <sup>+</sup>                     | -                        | -       | -                        | <b>0.60</b> <sup>†</sup> | 0.03                     | 0.02                     | <b>0.22</b> <sup>+</sup> | 0.06                     | 0.02 | 0.02                     | 0.04                     | -                        |         |  |
| 'Takenakae'/東海桜 (Cer221-ii)                      | ○                                         | ○   | -   | ○   | -       | ○   | -       | -   | -   | -   | -   | -                                           | <b>0.59</b> <sup>†</sup> | 0.04                     | <b>0.25</b> <sup>+</sup> | 0.02                     | <b>0.08</b> <sup>+</sup>                     | -                        | -       | -                        | <b>0.60</b> <sup>†</sup> | 0.03                     | 0.02                     | <b>0.21</b> <sup>+</sup> | 0.05                     | 0.02 | 0.01                     | 0.04                     | -                        |         |  |

a, The abbreviated names used for *P. campanulata*, *P. pseudocerasus*, *P. pendula* f. *ascendens*, *P. apetala* var. *apetala*, *P. apetala* var. *pilosa*, *P. incisa* var. *incisa*, *P. incisa* var. *kinkiensis*, *P. nipponica*, *P. sargentii*, *P. verecunda*, *P. jamasakura*, *P. lannesiana* var. *speciosa* are cam, pse, pen, ape, ape.pil, inc, inc.kin, nip, sar, ver, jam and lan.spe, respectively. Circle: *Prunus* taxon believed to contribute to cultivar origin; hyphen: taxon not exerting an influence on the cultivar. The baseline information was obtained from the descriptions in ten scientific papers listed in the Sample Collection section of Kato et al. (2012).

b, The significance of each  $q$  value is given by ‡ if the probability interval (PI) > 0.5, † if PI > 0.25 and + if PI > 0, and these values are also shown in boldface. Hyphen:  $q$  value less than 0.01. The clusters most probably representing individual taxa are named on the basis of the corresponding taxonomic names, and the cluster names are defined in Table 1.
